# Supplementary material for: Chemical composition and larvicidal activities of Azolla pinnata extracts against Aedes (Diptera:Culicidae)
Source: PubMed Central journal article supplement (PMC6219802; doi:10.1371/journal.pone.0206982), 2018-11-06

Sample Information

LIBRARY SEARCH  
 ID : B  
 Sample Name : MAC\_2000  
 Date : 12/3/2018

Library

<< Target >>

Line# 1 R.Time: 3.500(Scan#: 1) MassPeaks: 441  
 RawMode: Single 3.500(1) BasePeak: 43.95(25562)  
 BG Mode: None Group 1 - Event 1

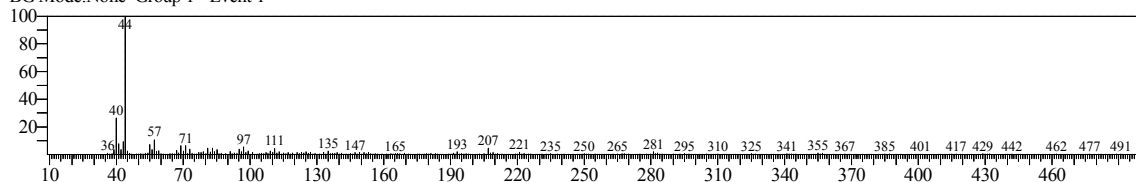

Hit# 1 Entry: 26089 Library: NIST08.LIB  
 SI: 77 Formula: C<sub>11</sub>H<sub>25</sub>N CAS: 13205-56-6 MolWeight: 171 RetIndex: 1294  
 CompName: 1-Methyldecylamine \$\$ 2-Undecylamine \$\$ 2-Undecanamine \$\$ 2-Aminoundecane \$\$

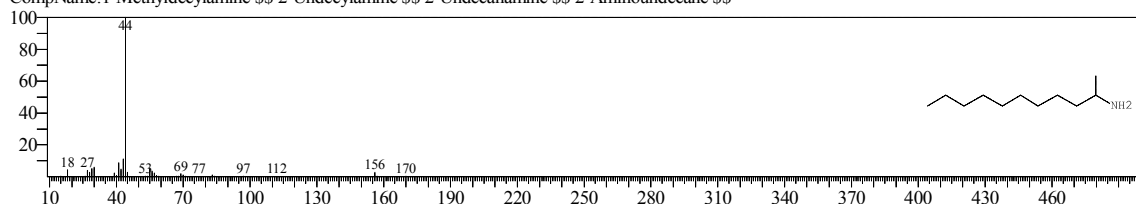

Hit# 2 Entry: 1830 Library: NIST08.LIB  
 SI: 76 Formula: C<sub>6</sub>H<sub>13</sub>N CAS: 5831-72-1 MolWeight: 99 RetIndex: 806  
 CompName: Methylpent-4-enylamine \$\$ N-Methyl-N-(4-pentenyl)amine # \$\$

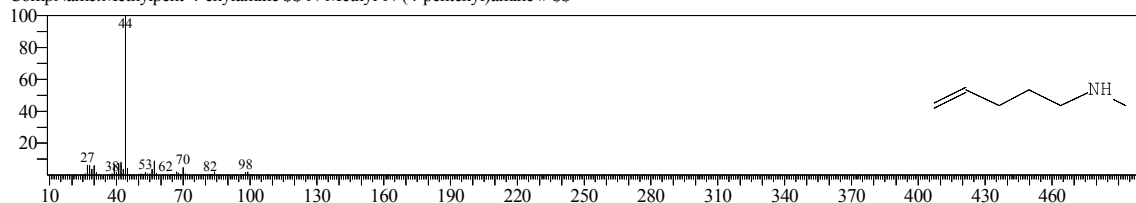

Hit# 3 Entry: 43663 Library: NIST08.LIB  
 SI: 76 Formula: C<sub>9</sub>H<sub>18</sub>N<sub>2</sub>O<sub>3</sub> CAS: 19079-66-4 MolWeight: 202 RetIndex: 1787  
 CompName: dl-Alanyl-dl-norleucine \$\$ N-(2-Aminopropanoyl)norleucine # \$\$

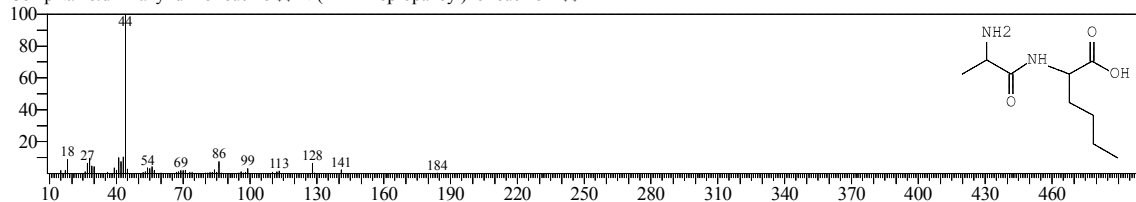

Hit# 4 Entry: 13405 Library: NIST08.LIB  
 SI: 76 Formula: C<sub>5</sub>H<sub>10</sub>N<sub>2</sub>O<sub>3</sub> CAS: 1188-01-8 MolWeight: 146 RetIndex: 1454  
 CompName: N-dl-Alanylglycine \$\$ Glycine, N-DL-alanyl- \$\$ [(2-Aminopropanoyl)amino]acetic acid # \$\$

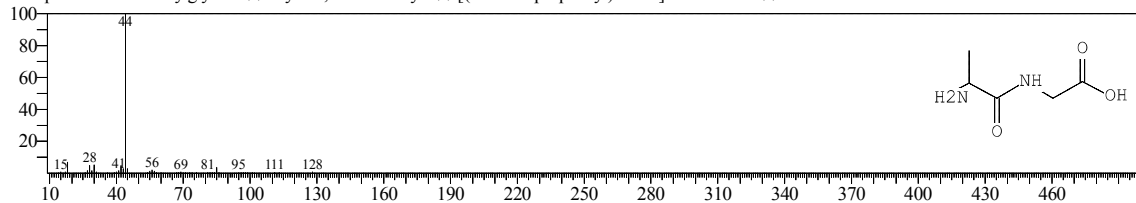

Hit# 5 Entry: 99894 Library: NIST08.LIB  
 SI: 76 Formula: C<sub>19</sub>H<sub>41</sub>N CAS: 31604-55-4 MolWeight: 283 RetIndex: 2089  
 CompName: 2-Aminononadecane \$\$ 1-Methyloctadecylamine # \$\$

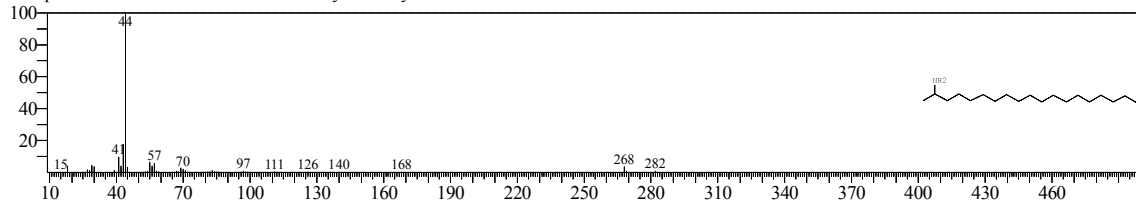

<< Target >>

Line#:2 R.Time:3.500(Scan#:1) MassPeaks:441  
RawMode:Single 3.500(1) BasePeak:43.95(25562)  
BG Mode:None Group 1 - Event 1

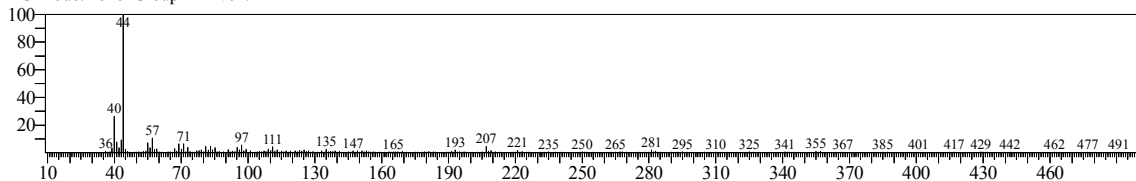

Hit#:1 Entry:26089 Library:NIST08.LIB  
SI:77 Formula:C11H25N CAS:13205-56-6 MolWeight:171 RetIndex:1294  
CompName:1-Methyldecylamine \$\$ 2-Undecylamine \$\$ 2-Undecanamine \$\$ 2-Aminoundecane \$\$

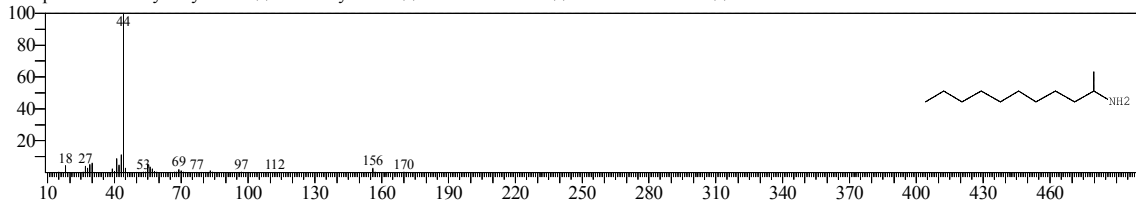

Hit#:2 Entry:1830 Library:NIST08.LIB  
SI:76 Formula:C6H13N CAS:5831-72-1 MolWeight:99 RetIndex:806  
CompName:Methylpent-4-enylamine \$\$ N-Methyl-N-(4-pentenyl)amine # \$\$

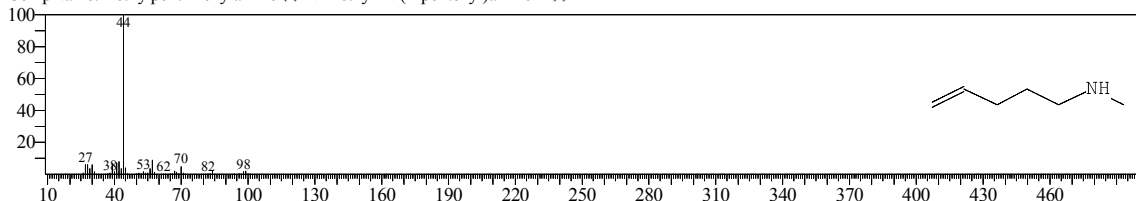

Hit#:3 Entry:43663 Library:NIST08.LIB  
SI:76 Formula:C9H18N2O3 CAS:19079-66-4 MolWeight:202 RetIndex:1787  
CompName:dl-Alanyl-dl-norleucine \$\$ N-(2-Aminopropanoyl)norleucine # \$\$

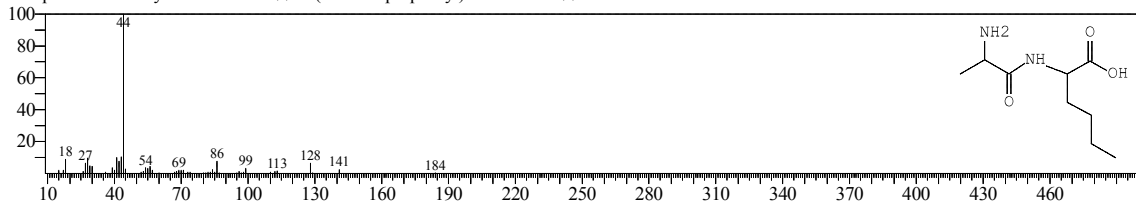

Hit#:4 Entry:13405 Library:NIST08.LIB  
SI:76 Formula:C5H10N2O3 CAS:1188-01-8 MolWeight:146 RetIndex:1454  
CompName:N-dl-Alanylglycine \$\$ Glycine, N-DL-alanyl- \$\$ [(2-Aminopropanoyl)amino]acetic acid # \$\$

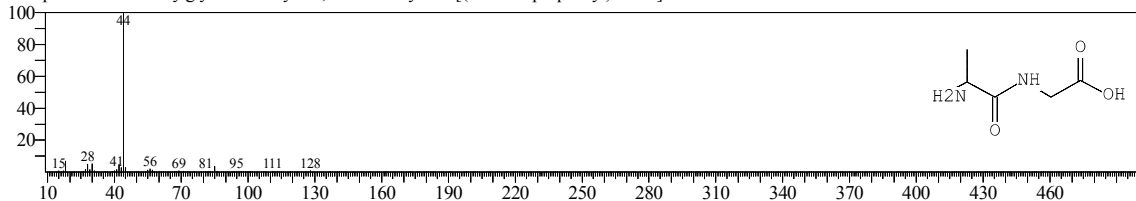

Hit#:5 Entry:99894 Library:NIST08.LIB  
SI:76 Formula:C19H41N CAS:31604-55-4 MolWeight:283 RetIndex:2089  
CompName:2-Aminononadecane \$\$ 1-Methyloctadecylamine # \$\$

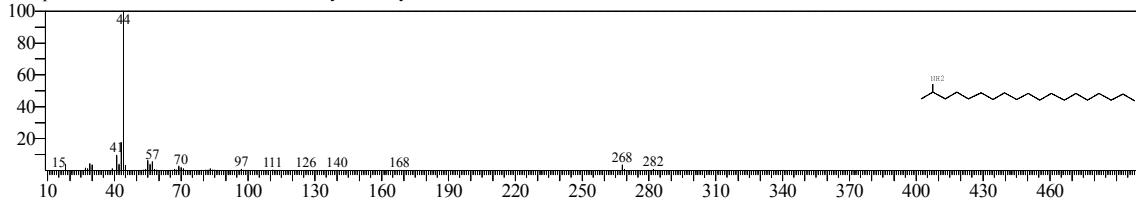

<< Target >>

Line# 3 R.Time:26.005(Scan#:4502) MassPeaks:252  
RawMode:Single 26.005(4502) BasePeak:39.95(8786)  
BG Mode:25.855(4472) Group 1 - Event 1

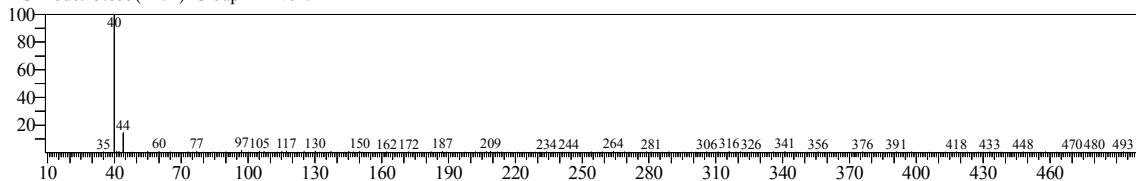

Hit#1 Entry:30 Library:NIST08.LIB  
SI:79 Formula:C3H4 CAS:74-99-7 MolWeight:40 RetIndex:317  
CompName:Propyne \$\$ Methylacetylene \$\$ 1-Propyne \$\$ Allylene \$\$ Propine \$\$ CH3C.S.CH \$\$ Acetylene, methyl-

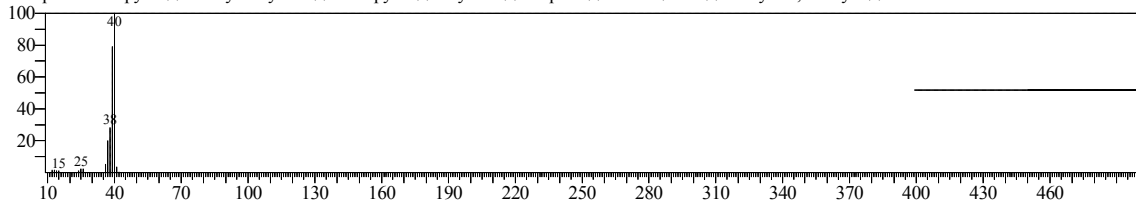

Hit#2 Entry:29 Library:NIST08.LIB  
SI:79 Formula:C3H4 CAS:463-49-0 MolWeight:40 RetIndex:0  
CompName:Allene \$\$ Propadiene \$\$ 1,2-Propadiene \$\$ sym-Allylene \$\$ Dimethylenemethane \$\$ CH2=C=CH2 \$\$ Propadiene, inhibited \$\$ UN 2200 \$\$ P

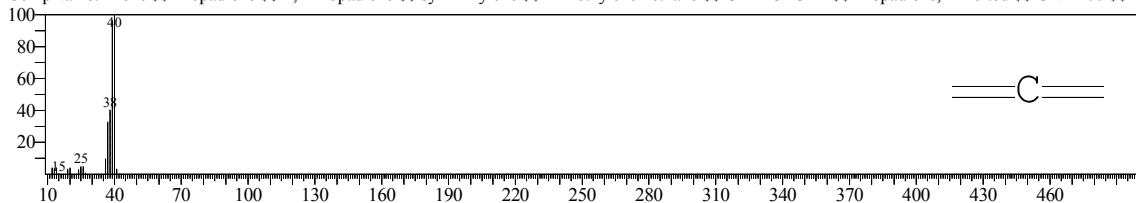

Hit#3 Entry:27 Library:NIST08.LIB  
SI:79 Formula:Ar CAS:7440-37-1 MolWeight:40 RetIndex:0  
CompName:Argon \$\$ Ar \$\$ UN 1006 \$\$ UN 1951 \$\$ argon atom

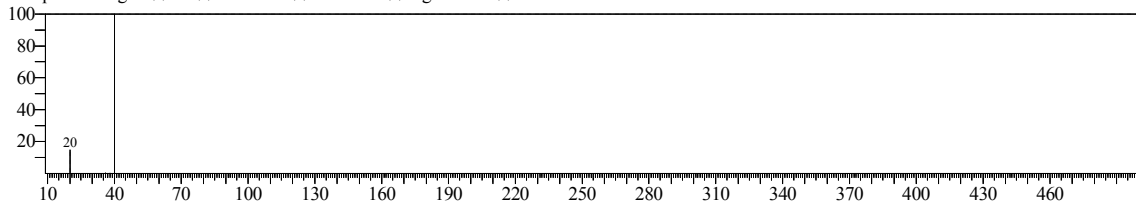

Hit#4 Entry:28 Library:NIST08.LIB  
SI:77 Formula:C3H4 CAS:2781-85-3 MolWeight:40 RetIndex:342  
CompName:Cyclopropene \$\$ 1-Cyclopropene #

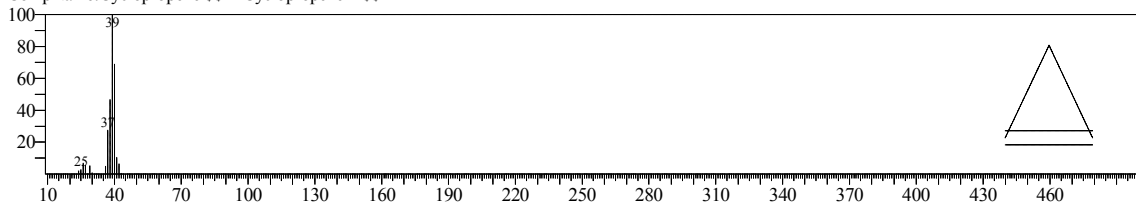

Hit#5 Entry:36 Library:NIST08.LIB  
SI:73 Formula:CH3BO CAS:13205-44-2 MolWeight:42 RetIndex:0  
CompName: Borane carbonyl \$\$ Boron, carbonyltrihydro-, (T-4)- \$\$ Borane, compd. with carbon monoxide (1:1) \$\$ Borane-carbon monoxide (1:1) \$\$ Bori

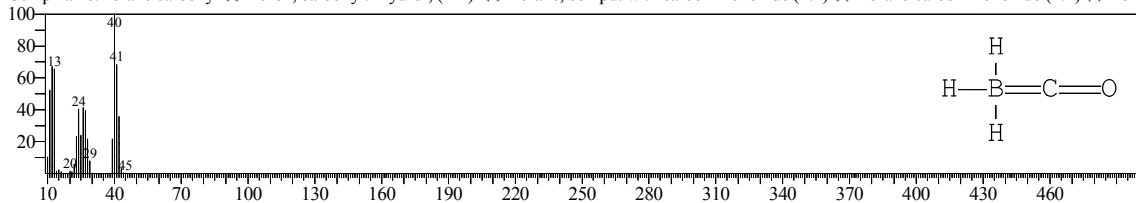

<< Target >>

Line#4 R.Time:26.820(Scan#:4665) MassPeaks:237  
RawMode:Single 26.820(4665) BasePeak:57.05(1005)  
BG Mode:26.765(4654) Group 1 - Event 1

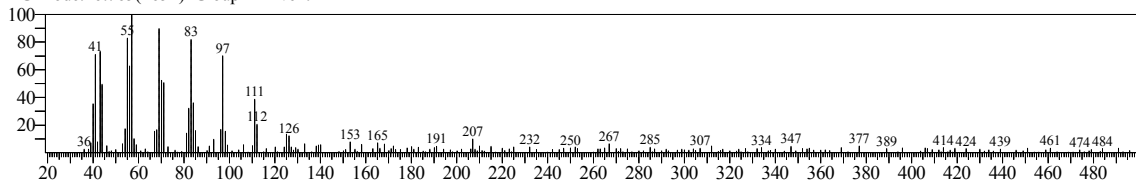

Hit#1 Entry:20509 Library:NIST08s.LIB  
SI:90 Formula:C17H34 CAS:6765-39-5 MolWeight:238 RetIndex:1701  
CompName:1-Heptadecene \$\$ Hexahydroaplotaxene \$\$

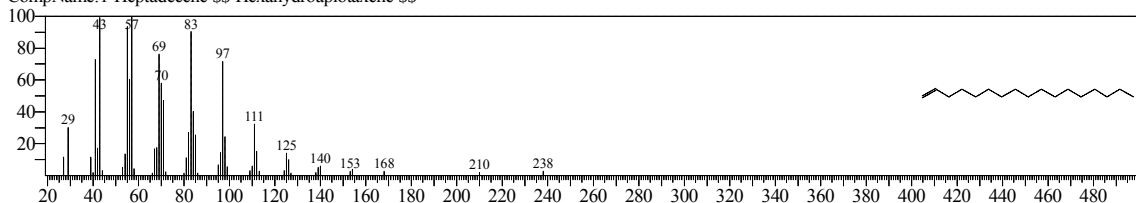

Hit#2 Entry:97784 Library:NIST08.LIB  
SI:89 Formula:C20H40 CAS:74685-29-3 MolWeight:280 RetIndex:2017  
CompName:9-Eicosene, (E)- \$\$ (9E)-9-Icosene # \$\$

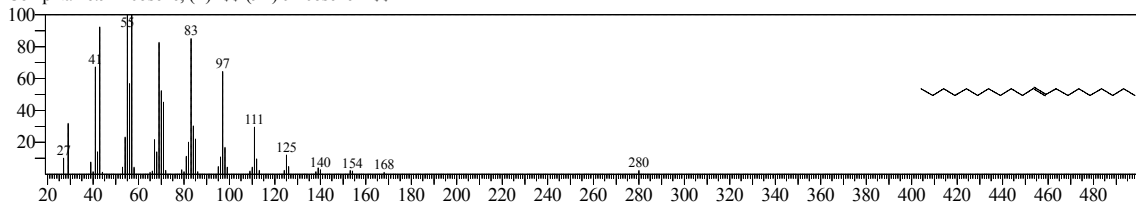

Hit#3 Entry:128430 Library:NIST08.LIB  
SI:89 Formula:C17H31F3O2 CAS:0-00-0 MolWeight:324 RetIndex:1713  
CompName:1-Pentadecyl trifluoroacetate

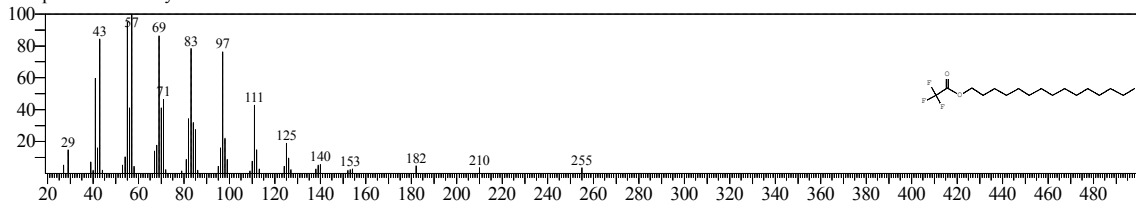

Hit#4 Entry:17848 Library:NIST08s.LIB  
SI:89 Formula:C15H30 CAS:13360-61-7 MolWeight:210 RetIndex:1502  
CompName:1-Pentadecene \$\$ Pentadecene, 1- \$\$ Pentadec-1-ene \$\$

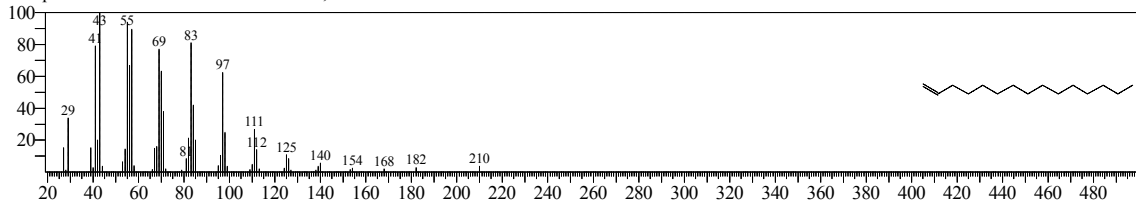

Hit#5 Entry:97785 Library:NIST08.LIB  
SI:89 Formula:C20H40 CAS:74685-33-9 MolWeight:280 RetIndex:2017  
CompName:3-Eicosene, (E)- \$\$ (3E)-3-Icosene # \$\$

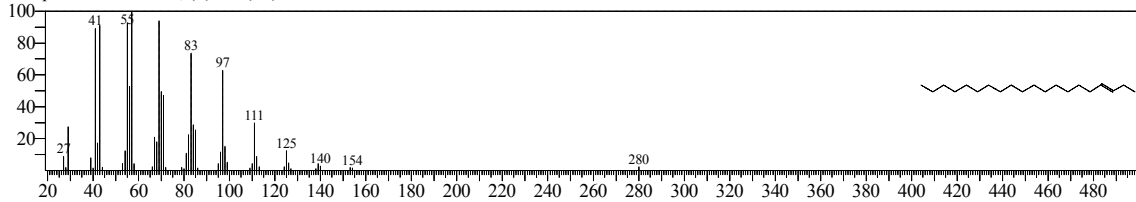

<< Target >>

Line#:5 R.Time:34.435(Scan#:6188) MassPeaks:256  
RawMode:Single 34.435(6188) BasePeak:83.10(1580)  
BG Mode:34.345(6170) Group 1 - Event 1

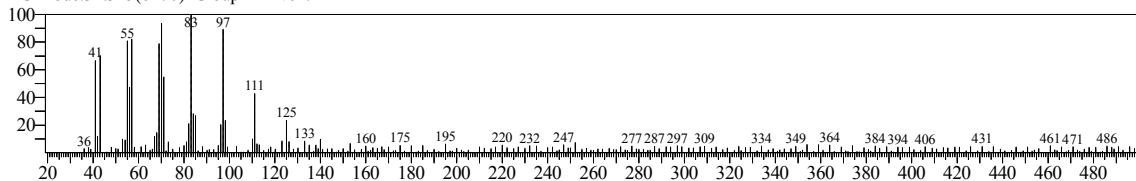

Hit#:1 Entry:22496 Library:NIST08s.LIB  
SI:89 Formula:C19H38 CAS:18435-45-5 MolWeight:266 RetIndex:1900  
CompName:1-Nonadecene

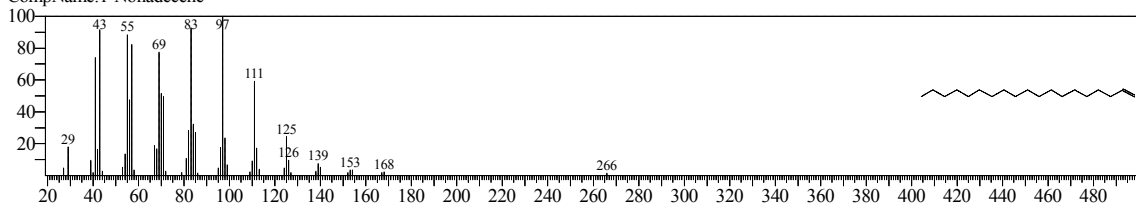

Hit#:2 Entry:100901 Library:NIST08.LIB  
SI:89 Formula:C19H40O CAS:1454-84-8 MolWeight:284 RetIndex:2153  
CompName:n-Nonadecanol-1 \$1-Nonadecanol \$ Nonadecanol \$ Nonadecan-1-ol \$ Nonadecyl alcohol \$

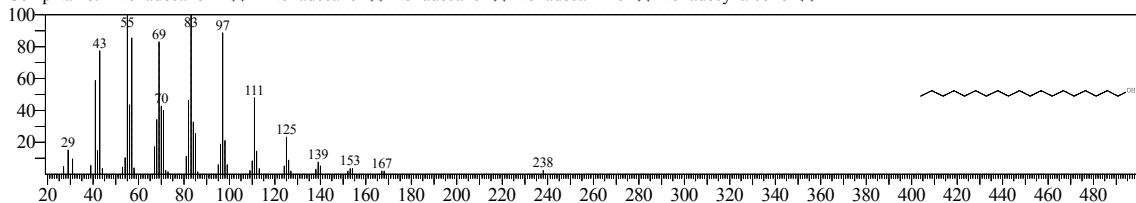

Hit#:3 Entry:61696 Library:NIST08.LIB  
SI:88 Formula:C15H32O CAS:629-76-5 MolWeight:228 RetIndex:1755  
CompName:n-Pentadecanol \$ n-1-Pentadecanol \$ Pentadecanol \$ Neodol 5 \$ 1-Pentadecanol \$ Pentadecan-1-ol \$ Pentadecyl alcohol \$

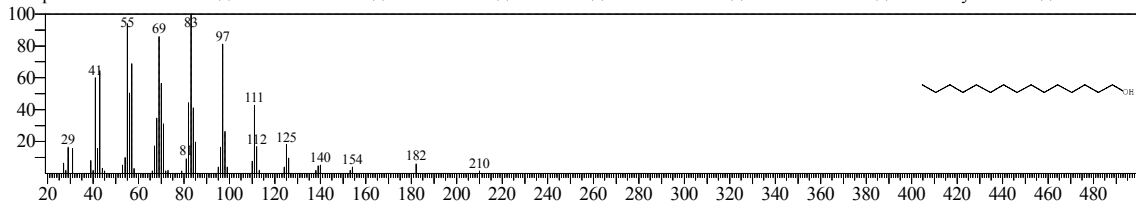

Hit#:4 Entry:153365 Library:NIST08.LIB  
SI:88 Formula:C19H36Cl2O2 CAS:0-00-0 MolWeight:366 RetIndex:2423  
CompName:Dichloroacetic acid, heptadecyl ester

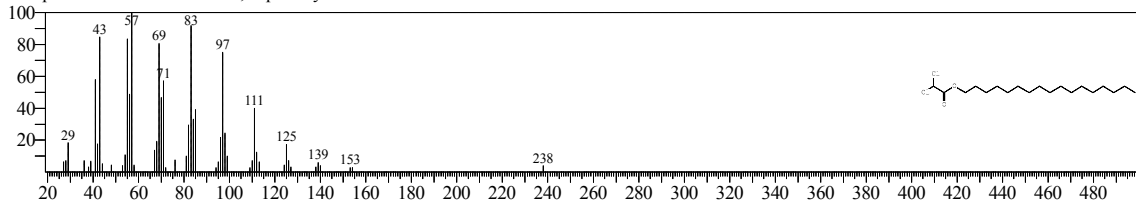

Hit#:5 Entry:25469 Library:NIST08s.LIB  
SI:88 Formula:C22H46O CAS:661-19-8 MolWeight:326 RetIndex:2451  
CompName:Behenic alcohol \$ 1-Docosanol \$ Docosyl alcohol \$ Docosanol(1) \$ Cachalot BE-22 \$ Dehydag wax 22 (lanette) \$ Emery 3304 \$ Lo

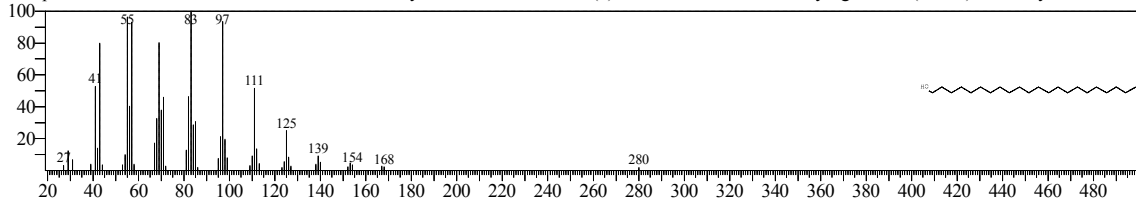

<< Target >>

Line#:6 R.Time:35.925(Scan#:6486) MassPeaks:290  
RawMode:Single 35.925(6486) BasePeak:68.00(22227)  
BG Mode:35.835(6468) Group 1 - Event 1

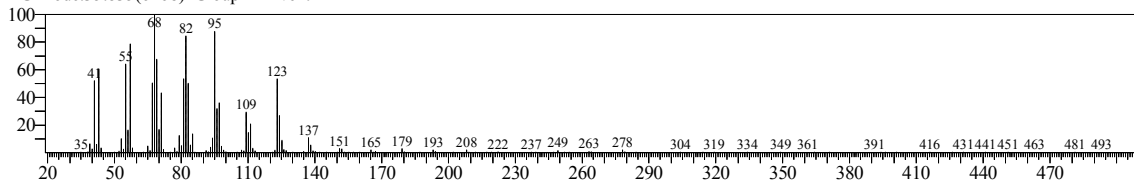

Hit#:1 Entry:908 Library:FFNSC1.3.lib  
SI:95 Formula:C20 H38 CAS:504-96-1 MolWeight:278 RetIndex:1836  
CompName:Neophytadiene

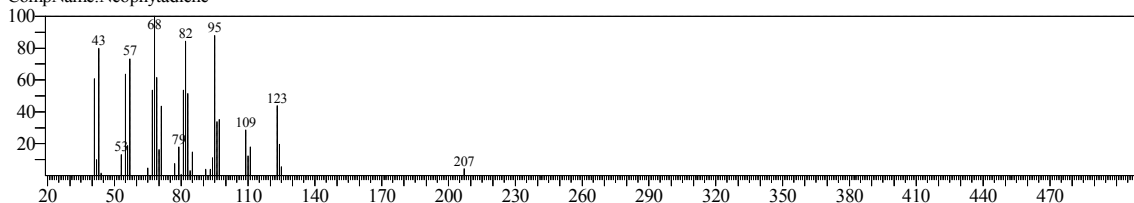

Hit#:2 Entry:109355 Library:NIST08.LIB  
SI:90 Formula:C20H40O CAS:102608-53-7 MolWeight:296 RetIndex:2045  
CompName:3,7,11,15-Tetramethyl-2-hexadecen-1-ol (E)-3,7,11,15-Tetramethyl-2-hexadecen-1-ol #

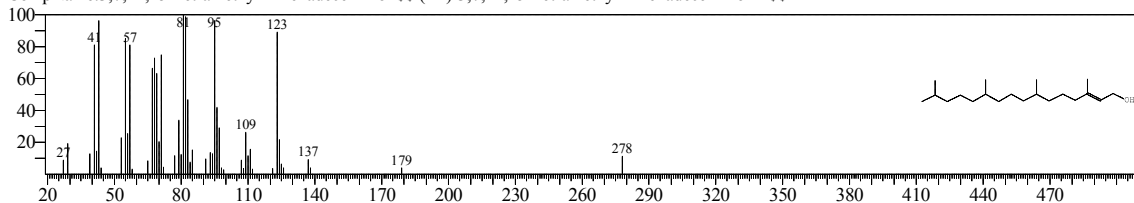

Hit#:3 Entry:60326 Library:NIST08.LIB  
SI:88 Formula:C15H30O CAS:2765-11-9 MolWeight:226 RetIndex:1701  
CompName:Pentadecanal-

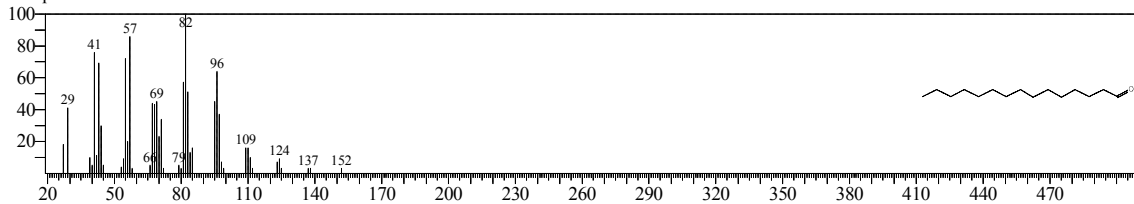

Hit#:4 Entry:89232 Library:NIST08.LIB  
SI:88 Formula:C18H36O CAS:143-28-2 MolWeight:268 RetIndex:2061  
CompName:Oleyl Alcohol (E)-9-Octadecen-1-ol, (Z)- cis-9-Octadecen-1-ol (Z)- cis-9-Octadecenyl Alcohol (E)-9-Octadecen-1-ol (Z)- cis-9-Octadecenyl Alcohol (E)-9-Octadecen-1-ol (Z)- cis-9-Octadecenyl Alcohol (E)-9-Octadecen-1-ol (Z)- cis-9-Octadecenyl Alcohol

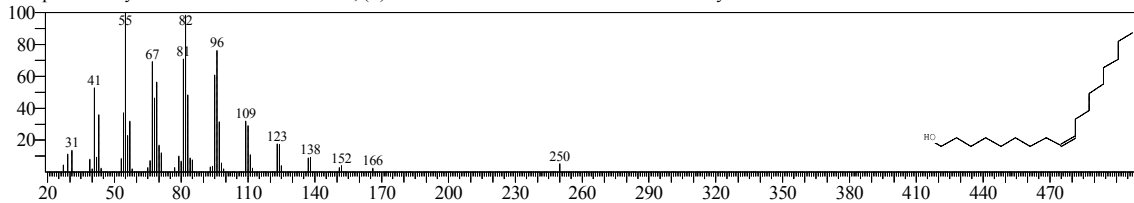

Hit#:5 Entry:1115 Library:FFNSC1.3.lib  
SI:88 Formula:C22 H42 O2 CAS:76337-16-1 MolWeight:338 RetIndex:2212  
CompName:Phytol acetate

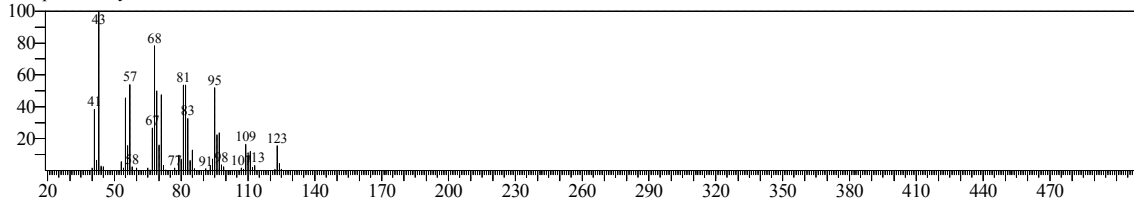

<< Target >>

Line#:7 R.Time:36.810(Scan#:6663) MassPeaks:265  
RawMode:Single 36.810(6663) BasePeak:82.10(4546)  
BG Mode:36.730(6647) Group 1 - Event 1

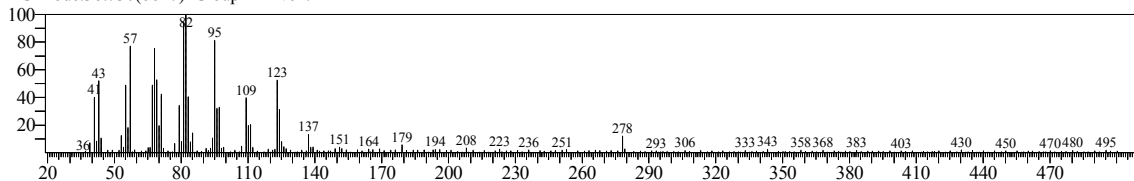

Hit#:1 Entry:109355 Library:NIST08.LIB  
SI:92 Formula:C20H40O CAS:102608-53-7 MolWeight:296 RetIndex:2045  
CompName:3,7,11,15-Tetramethyl-2-hexadecen-1-ol \$\$ (2E)-3,7,11,15-Tetramethyl-2-hexadecen-1-ol # \$\$

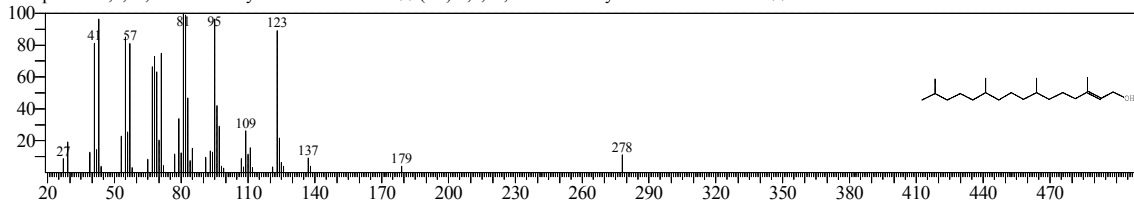

Hit#:2 Entry:908 Library:FFNSC1.3.lib  
SI:90 Formula:C20H38 CAS:504-96-1 MolWeight:278 RetIndex:1836  
CompName:Neophytadiene

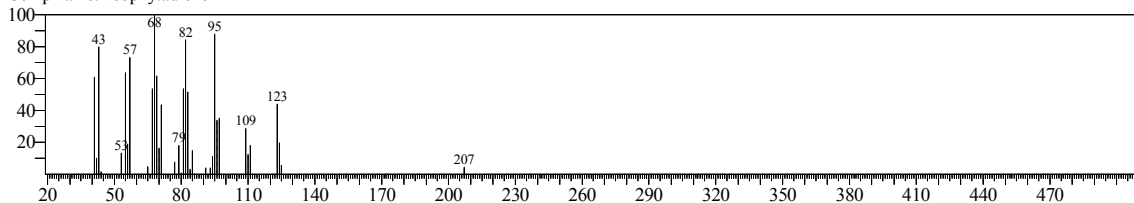

Hit#:3 Entry:96436 Library:NIST08.LIB  
SI:87 Formula:C20H38 CAS:61886-66-6 MolWeight:278 RetIndex:2027  
CompName:3-Eicosyne \$\$ 3-Icosyne # \$\$

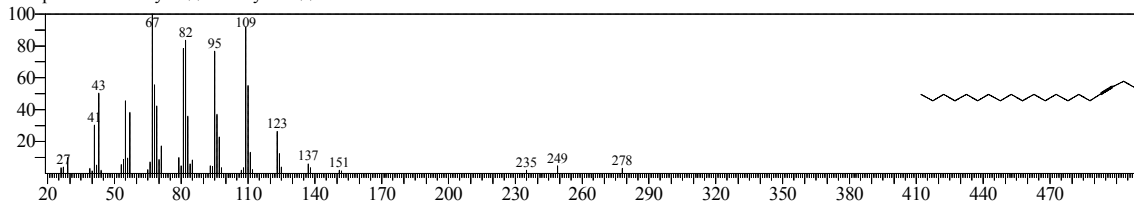

Hit#:4 Entry:86382 Library:NIST08.LIB  
SI:87 Formula:C19H36 CAS:35354-38-2 MolWeight:264 RetIndex:1863  
CompName:7-Octadecyne, 2-methyl- \$\$ 2-Methyl-7-octadecyne \$\$

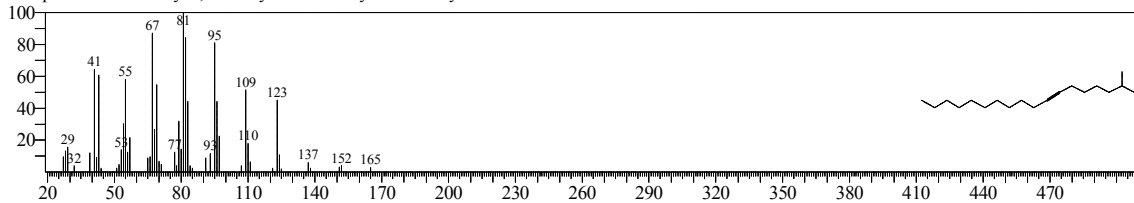

Hit#:5 Entry:96439 Library:NIST08.LIB  
SI:87 Formula:C20H38 CAS:71899-38-2 MolWeight:278 RetIndex:2027  
CompName:9-Eicosyne \$\$ 9-Icosyne # \$\$

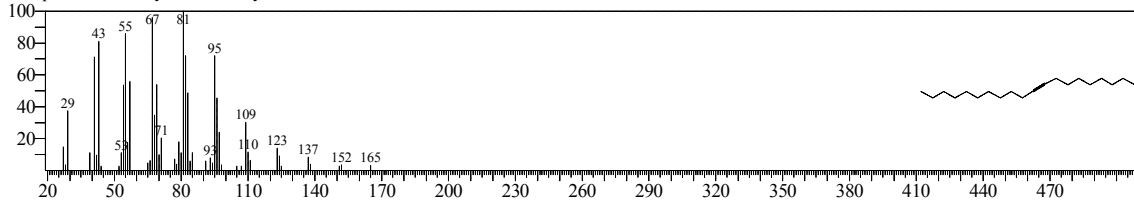

<< Target >>

Line#:8 R.Time:37.450(Scan#:6791) MassPeaks:284  
RawMode:Single 37.450(6791) BasePeak:82.10(7010)  
BG Mode:37.325(6766) Group 1 - Event 1

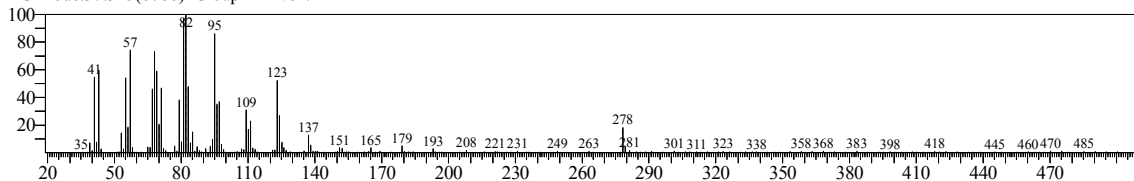

Hit#:1 Entry:109355 Library:NIST08.LIB  
SI:92 Formula:C20H40O CAS:102608-53-7 MolWeight:296 RetIndex:2045  
CompName:3,7,11,15-Tetramethyl-2-hexadecen-1-ol \$\$ (2E)-3,7,11,15-Tetramethyl-2-hexadecen-1-ol # \$\$

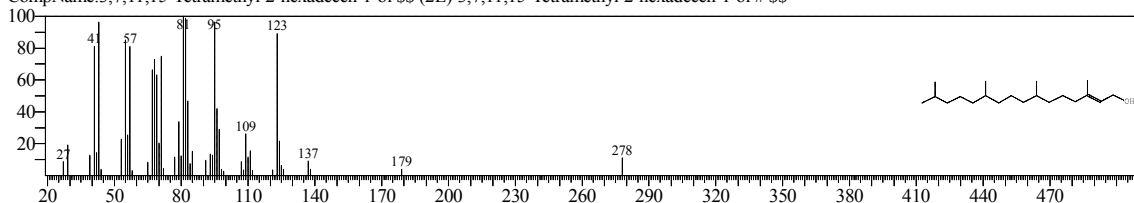

Hit#:2 Entry:908 Library:FFNSC1.3.lib  
SI:91 Formula:C20H38 CAS:504-96-1 MolWeight:278 RetIndex:1836  
CompName:Neophytadiene



Hit#:3 Entry:86382 Library:NIST08.LIB  
SI:87 Formula:C19H36 CAS:35354-38-2 MolWeight:264 RetIndex:1863  
CompName:7-Octadecyne, 2-methyl- \$\$ 2-Methyl-7-octadecyne \$\$

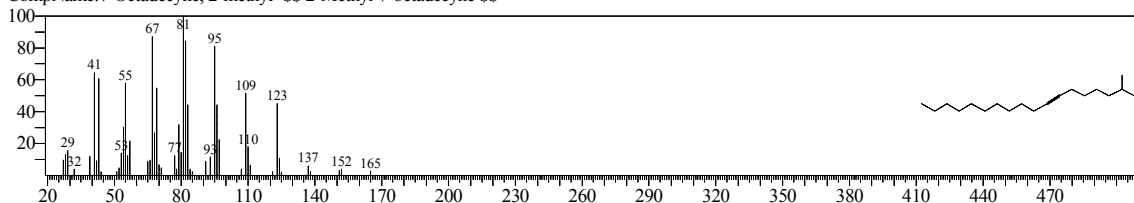

Hit#:4 Entry:89232 Library:NIST08.LIB  
SI:86 Formula:C18H36O CAS:143-28-2 MolWeight:268 RetIndex:2061  
CompName:Oleyl Alcohol \$\$ 9-Octadecen-1-ol, (Z)- \$\$ cis-9-Octadecen-1-ol \$\$ cis-9-Octadecenyl Alcohol \$\$ Adol 320 \$\$ Adol 85 \$\$ Atalco O \$\$ Cachal

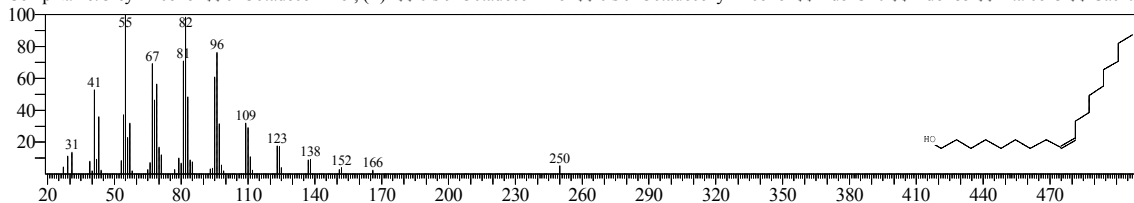

Hit#:5 Entry:96439 Library:NIST08.LIB  
SI:86 Formula:C20H38 CAS:71899-38-2 MolWeight:278 RetIndex:2027  
CompName:9-Eicosyne \$\$ 9-Icosyne # \$\$

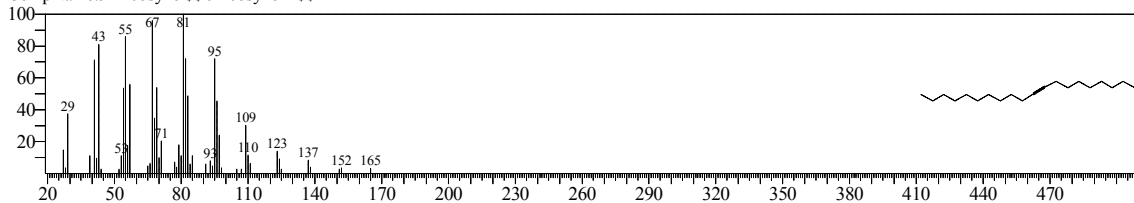



<< Target >>

Line#:9 R.Time:39.260(Scan#:7153) MassPeaks:273  
RawMode:Single 39.260(7153) BasePeak:74.00(11311)  
BG Mode:39.180(7137) Group 1 - Event 1

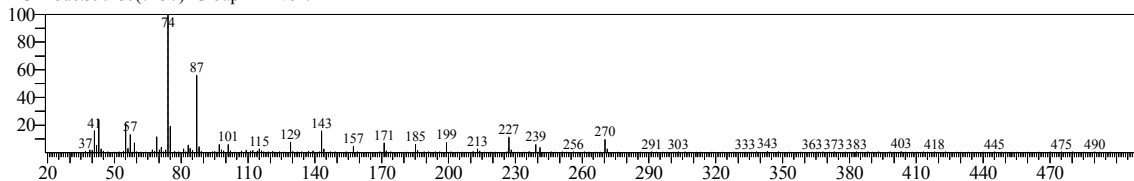

Hit#:1 Entry:587 Library:FFNSC1.3.lib  
SI:93 Formula:C17H34O2 CAS:112-39-0 MolWeight:270 RetIndex:1925  
CompName:Hexadecanoate <methyl->

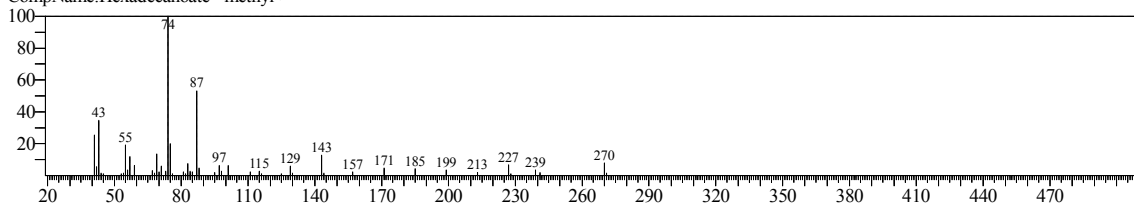

Hit#:2 Entry:90723 Library:NIST08.LIB  
SI:89 Formula:C17H34O2 CAS:27147-71-3 MolWeight:270 RetIndex:2003  
CompName:Hexadecanoic acid, 2-methyl- \$\$ 2-Methylhexadecanoic acid # \$\$

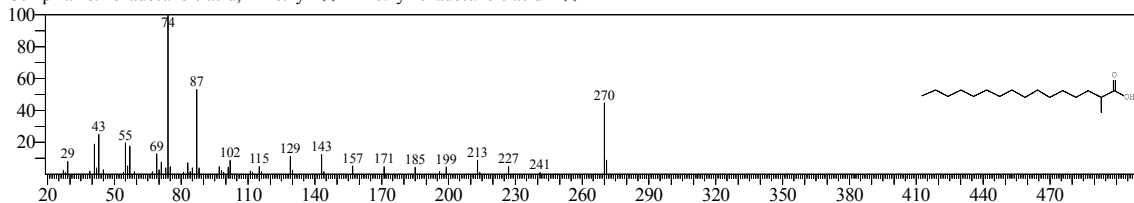

Hit#:3 Entry:80758 Library:NIST08.LIB  
SI:89 Formula:C16H32O2 CAS:7132-64-1 MolWeight:256 RetIndex:1779  
CompName: Pentadecanoic acid, methyl ester \$\$ Methyl n-pentadecanoate \$\$ Methyl pentadecanoate \$\$ n-Pentadecanoic acid methyl ester \$\$

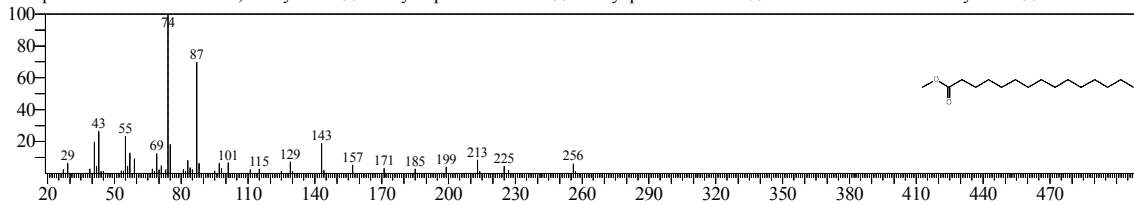

Hit#:4 Entry:90720 Library:NIST08.LIB  
SI:89 Formula:C17H34O2 CAS:5129-60-2 MolWeight:270 RetIndex:1814  
CompName: Pentadecanoic acid, 14-methyl-, methyl ester \$\$ Methyl 14-methylpentadecanoate # \$\$

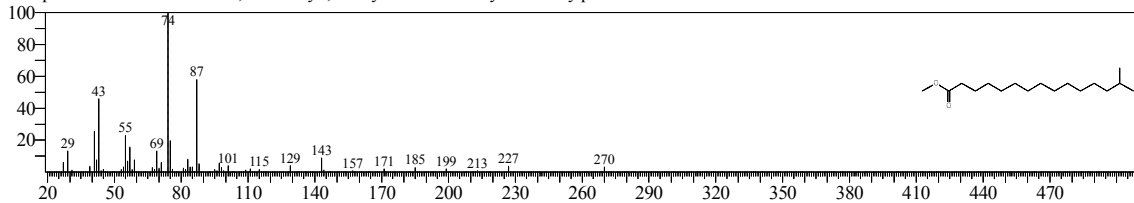

Hit#:5 Entry:61606 Library:NIST08.LIB  
SI:89 Formula:C14H28O2 CAS:1731-88-0 MolWeight:228 RetIndex:1580  
CompName: Tridecanoic acid, methyl ester \$\$ Methyl tridecanoate \$\$ n-Tridecanoic acid methyl ester \$\$ Methyl ester of tridecanoic acid \$\$

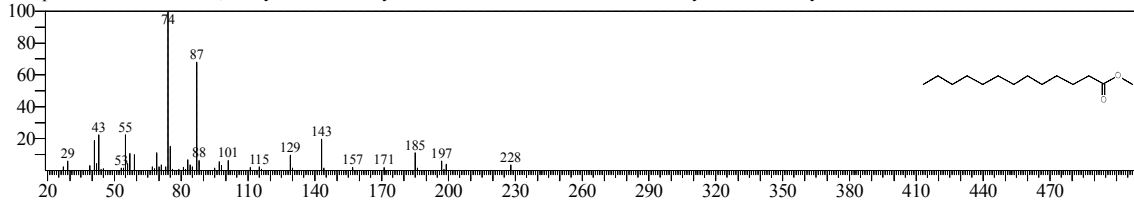

<< Target >>

Line#:10 R.Time:39.450(Scan#:7191) MassPeaks:287

RawMode:Single 39.450(7191) BasePeak:277.15(6051)

BG Mode:39.355(7172) Group 1 - Event 1

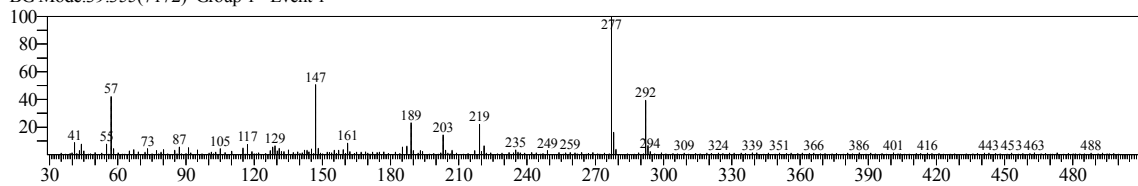

Hit#:1 Entry:106456 Library:NIST08.LIB

SI:84 Formula:C18H28O3 CAS:6386-38-5 MolWeight:292 RetIndex:2134

CompName:Benzenepropanoic acid, 3,5-bis(1,1-dimethylethyl)-4-hydroxy-, methyl ester \$Methyl 3-(3,5-di-tert-butyl-4-hydroxyphenyl)propionate \$Methyl

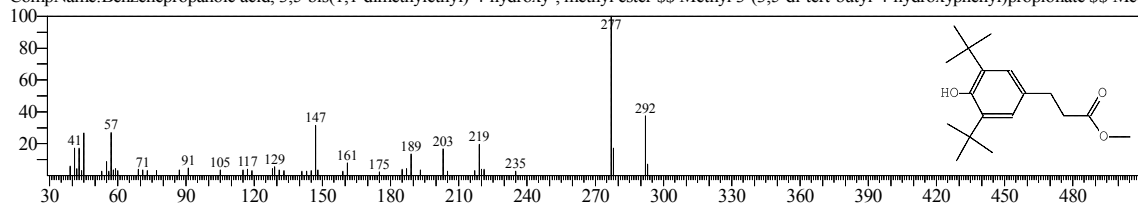

<< Target >>

Line#:11 R.Time:40.600(Scan#:7421) MassPeaks:272

RawMode:Single 40.600(7421) BasePeak:73.00(2658)

BG Mode:40.520(7405) Group 1 - Event 1

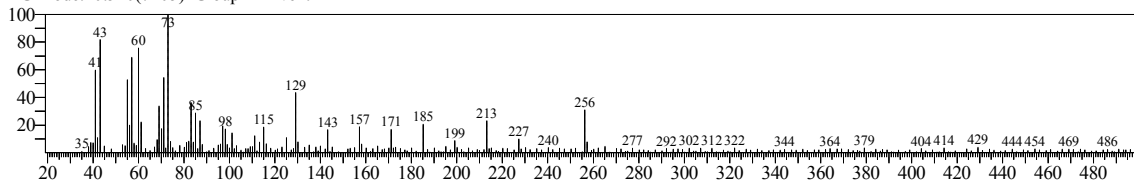

Hit#:1 Entry:626 Library:FFNSC1.3.lib

SI:91 Formula:C16 H32 O2 CAS:57-10-3 MolWeight:256 RetIndex:1977

CompName:Hexadecanoic acid <n>

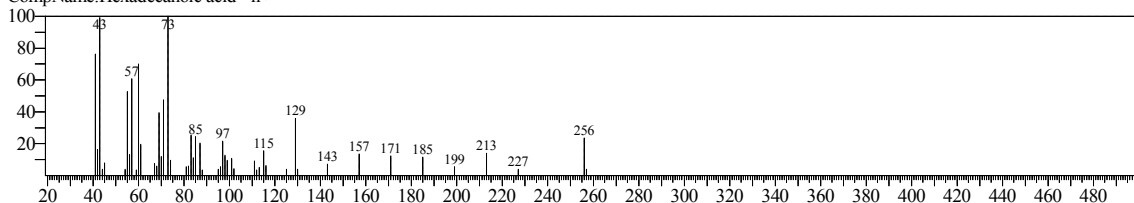

Hit#:2 Entry:189990 Library:NIST08.LIB

SI:91 Formula:C38H68O8 CAS:28474-90-0 MolWeight:652 RetIndex:4765

CompName:1-(+)-Ascorbic acid 2,6-dihexadecanoate

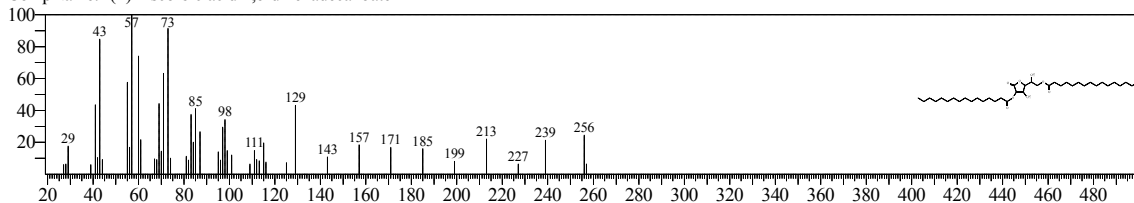

Hit#:3 Entry:20839 Library:NIST08s.LIB

SI:89 Formula:C15H30O2 CAS:1002-84-2 MolWeight:242 RetIndex:1869

CompName:Pentadecanoic acid \$\$ Pentadecylic acid \$\$ n-Pentadecanoic acid \$\$ n-Pentadecylic acid \$\$

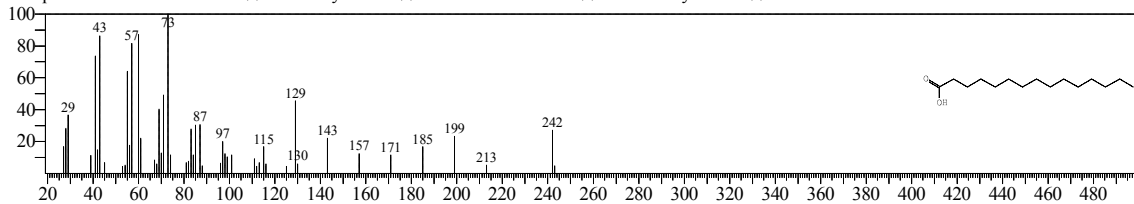

Hit#:4 Entry:61604 Library:NIST08.LIB

SI:87 Formula:C14H28O2 CAS:544-63-8 MolWeight:228 RetIndex:1769

CompName:Tetradecanoic acid \$\$ Myristic acid \$\$ n-Tetradecanoic acid \$\$ n-Tetradecic acid \$\$ Neo-Fat 14 \$\$ Univol U 316S \$\$ 1-Tridecanecarboxylic acid

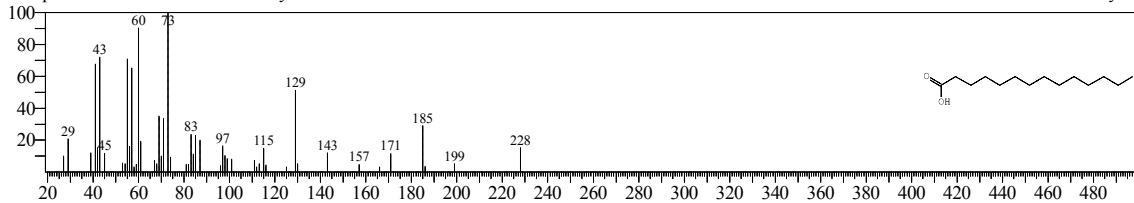

Hit#:5 Entry:100791 Library:NIST08.LIB

SI:86 Formula:C18H36O2 CAS:57-11-4 MolWeight:284 RetIndex:2167

CompName:Octadecanoic acid \$\$ Stearic acid \$\$ n-Octadecanoic acid \$\$ Humko Industrine R \$\$ Hydrofol Acid 150 \$\$ Hystrene S-97 \$\$ Hystrene T-70 S

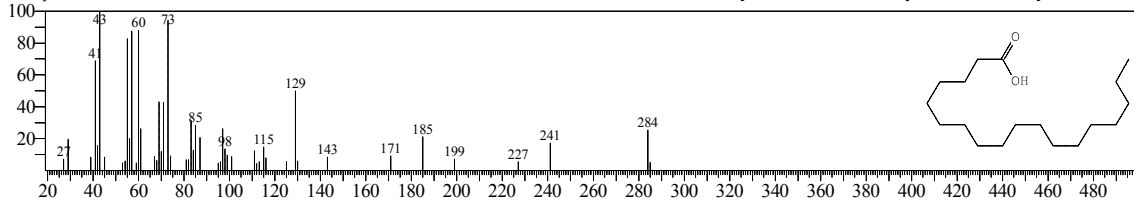

<< Target >>

Line#:12 R.Time:44.960(Scan#:8293) MassPeaks:295

RawMode:Single 44.960(8293) BasePeak:55.05(2650)

BG Mode:44.860(8273) Group 1 - Event 1

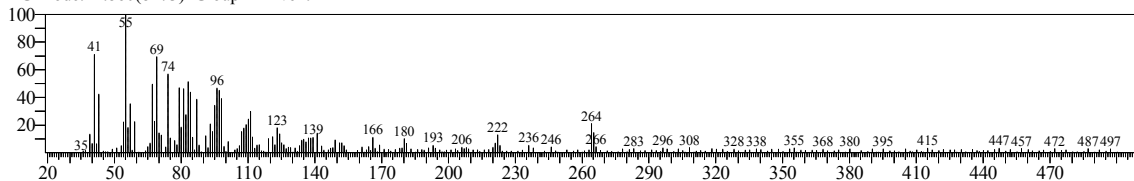

Hit#:1 Entry:24160 Library:NIST08s.LIB

SI:90 Formula:C19H36O2 CAS:1937-62-8 MolWeight:296 RetIndex:2085

CompName:9-Octadecenoic acid, methyl ester, (E)- \$\$ Elaidic acid, methyl ester \$\$ Methyl elaidate \$\$ Methyl trans-9-octadecenoate \$\$ (E)-9-Octadecenoic

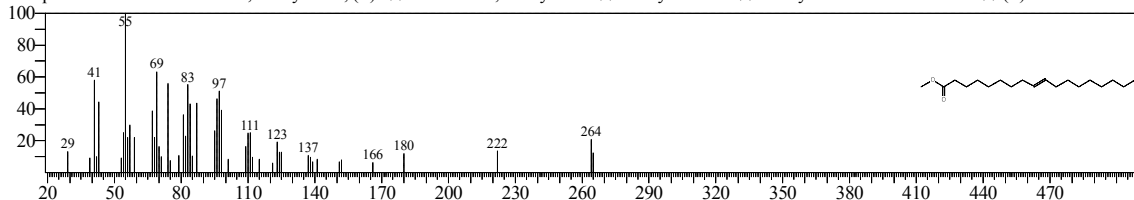

Hit#:2 Entry:109242 Library:NIST08.LIB

SI:88 Formula:C19H36O2 CAS:57396-98-2 MolWeight:296 RetIndex:2085

CompName:7-Octadecenoic acid, methyl ester \$\$ Methyl (7E)-7-octadecenoate # \$\$

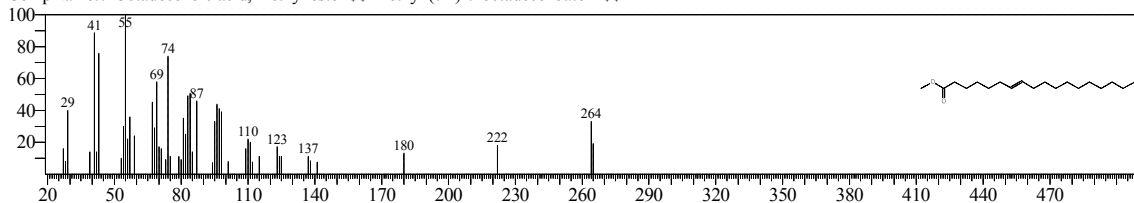

Hit#:3 Entry:109239 Library:NIST08.LIB

SI:88 Formula:C19H36O2 CAS:2345-29-1 MolWeight:296 RetIndex:2085

CompName:8-Octadecenoic acid, methyl ester \$\$ Methyl (8E)-8-octadecenoate # \$\$

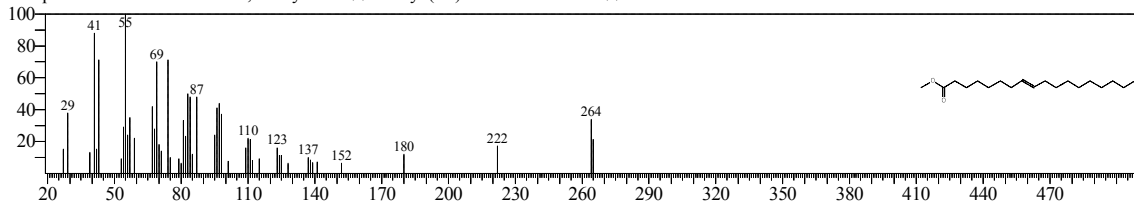

Hit#:4 Entry:109236 Library:NIST08.LIB

SI:88 Formula:C19H36O2 CAS:2777-58-4 MolWeight:296 RetIndex:2085

CompName:6-Octadecenoic acid, methyl ester, (Z)- \$\$ Methyl cis-6-octadecenoate \$\$ Methyl petroselinate \$\$ Methyl (6Z)-6-octadecenoate # \$\$

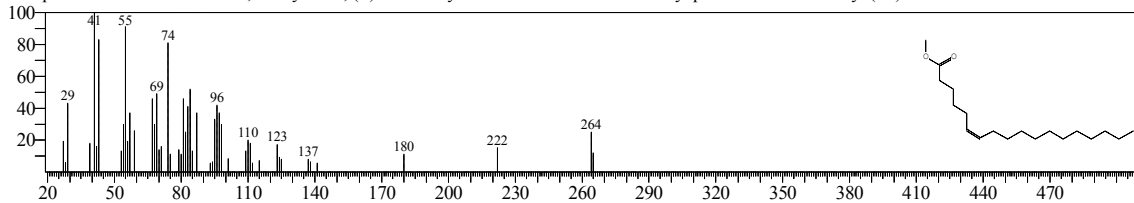

Hit#:5 Entry:109280 Library:NIST08.LIB

SI:88 Formula:C19H36O2 CAS:52355-31-4 MolWeight:296 RetIndex:2085

CompName:6-Octadecenoic acid, methyl ester \$\$ Methyl 6-octadecenoate \$\$ Methyl (6E)-6-octadecenoate # \$\$

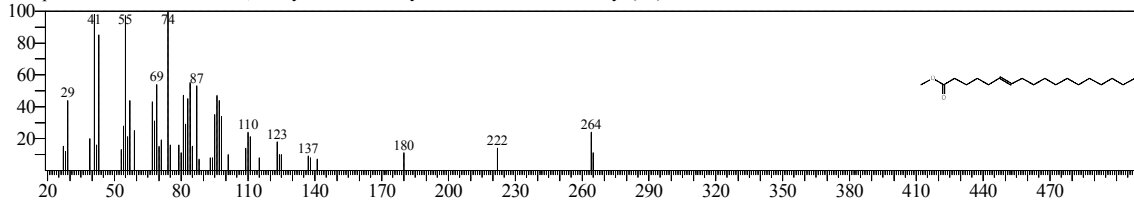

<< Target >>

Line#:13 R.Time:45.185(Scan#:8338) MassPeaks:254

RawMode:Single 45.185(8338) BasePeak:71.05(6837)

BG Mode:45.065(8314) Group 1 - Event 1

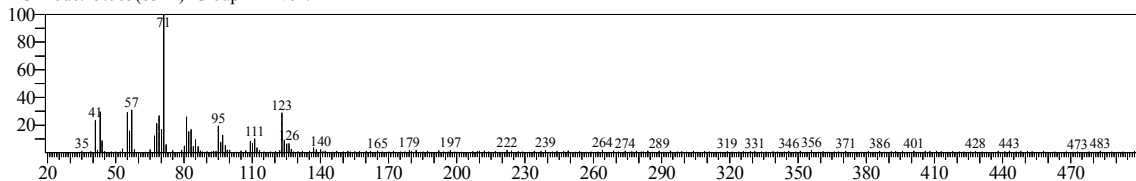

Hit#:1 Entry:24174 Library:NIST08s.LIB

SI:95 Formula:C20H40O CAS:150-86-7 MolWeight:296 RetIndex:2045

CompName:Phytol \$\$ 2-Hexadecen-1-ol, 3,7,11,15-tetramethyl-, [R-[R\*,R\*(E)]]- \$\$ trans-Phytol \$\$ 3,7,11,15-Tetramethyl-2-hexadecen-1-ol (2E)-3,7,1

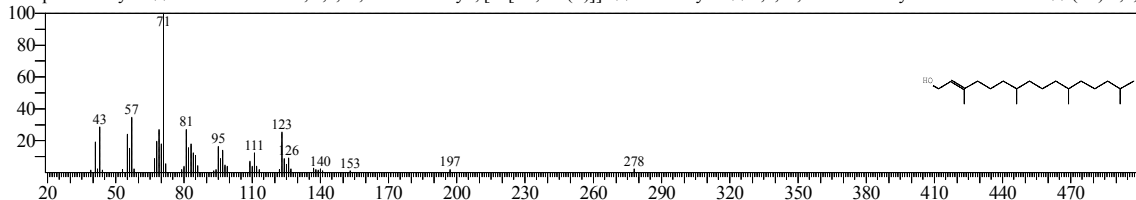

Hit#:2 Entry:421 Library:FFNSC1.3.lib

SI:91 Formula:C20H40O CAS:253686-88-3 MolWeight:296 RetIndex:2106

CompName:Phytol

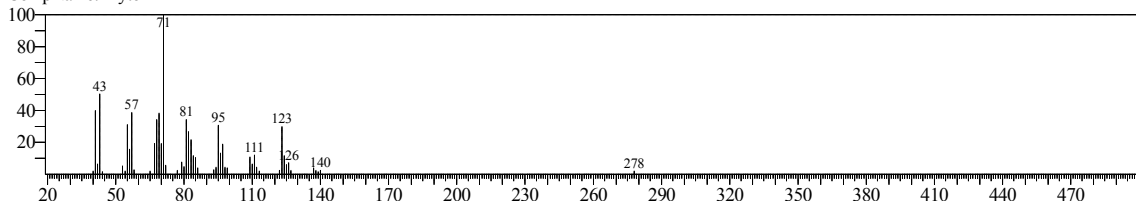

Hit#:3 Entry:18476 Library:NIST08.LIB

SI:87 Formula:C10H20O CAS:26489-01-0 MolWeight:156 RetIndex:1179

CompName:6-Octen-1-ol, 3,7-dimethyl-, (+/-)- \$\$ (+/-)-Citronellol \$\$ DL-Citronellol \$\$ Dihydrogeraniol \$\$ 6-Octen-1-ol, 3,7-dimethyl-, (+/-)- \$\$ (+/-)-

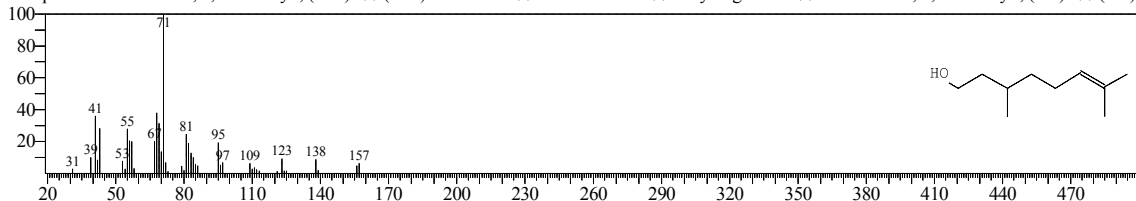

Hit#:4 Entry:18478 Library:NIST08.LIB

SI:86 Formula:C10H20O CAS:23283-97-8 MolWeight:156 RetIndex:1164

CompName:Cyclohexanol, 5-methyl-2-(1-methylethyl)-, [1S-(1.alpha.,2.beta.,5.beta.)]- \$\$ (1S,2R,5R)-(+)-Isomenthol \$\$ 2-Isopropyl-5-methylcyclohexanol

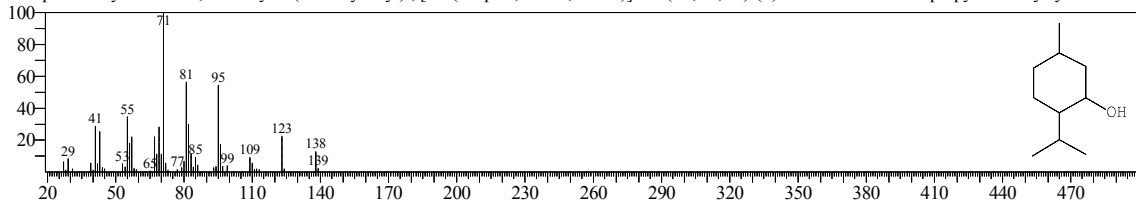

Hit#:5 Entry:9969 Library:NIST08s.LIB

SI:85 Formula:C10H20O CAS:490-99-3 MolWeight:156 RetIndex:1164

CompName:Cyclohexanol, 5-methyl-2-(1-methylethyl)-, (1.alpha.,2.beta.,5.beta.)- \$\$ Menthol, trans-1,3,cis-1,4- \$\$ Isomenthol \$\$ 2-Isopropyl-5-methylcyclohexanol

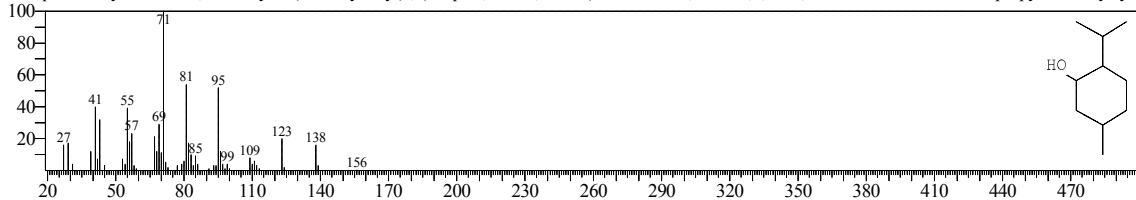

<< Target >>

Line#:14 R.Time:45.800(Scan#:8461) MassPeaks:274

RawMode:Single 45.800(8461) BasePeak:74.00(2881)

BG Mode:45.730(8447) Group 1 - Event 1

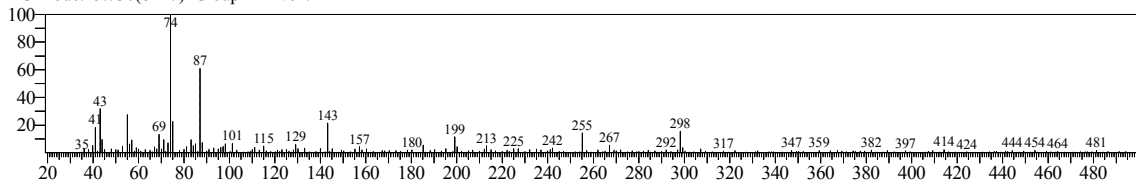

Hit#:1 Entry:110813 Library:NIST08.LIB

SI:89 Formula:C19H38O2 CAS:112-61-8 MolWeight:298 RetIndex:2077

CompName:Octadecanoic acid, methyl ester \$\$ Stearic acid, methyl ester \$\$ n-Octadecanoic acid, methyl ester \$\$ Kemester 9718 \$\$ Methyl n-octadecanoat

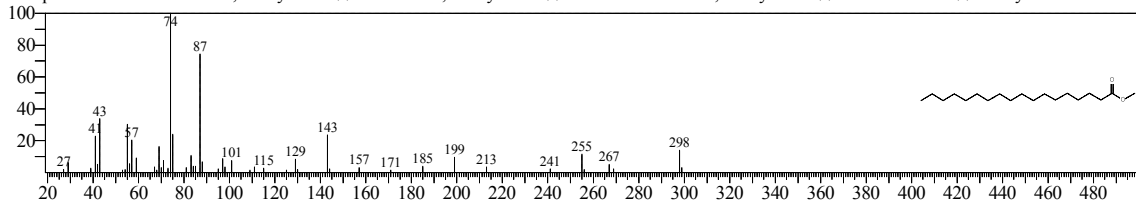

Hit#:2 Entry:24245 Library:NIST08s.LIB

SI:88 Formula:C19H38O2 CAS:5129-61-3 MolWeight:298 RetIndex:2013

CompName:Heptadecanoic acid, 16-methyl-, methyl ester \$\$ Methyl isostearate \$\$ Methyl 16-methylheptadecanoate \$\$

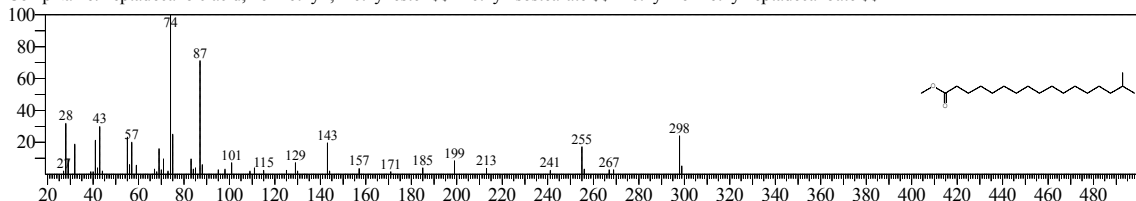

Hit#:3 Entry:70953 Library:NIST08.LIB

SI:85 Formula:C15H30O2 CAS:124-10-7 MolWeight:242 RetIndex:1680

CompName:Methyl tetradecanoate \$\$ Tetradecanoic acid, methyl ester \$\$ Myristic acid, methyl ester \$\$ Metholeneat 2495 \$\$ Methyl myristate \$\$ Methyl n

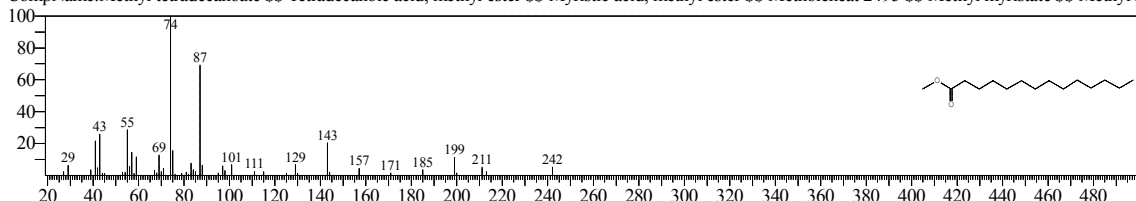

Hit#:4 Entry:80758 Library:NIST08.LIB

SI:85 Formula:C16H32O2 CAS:7132-64-1 MolWeight:256 RetIndex:1779

CompName:Hexadecanoic acid, methyl ester \$\$ Methyl n-hexadecanoate \$\$ Methyl hexadecanoate \$\$ n-Hexadecanoic acid methyl ester \$\$

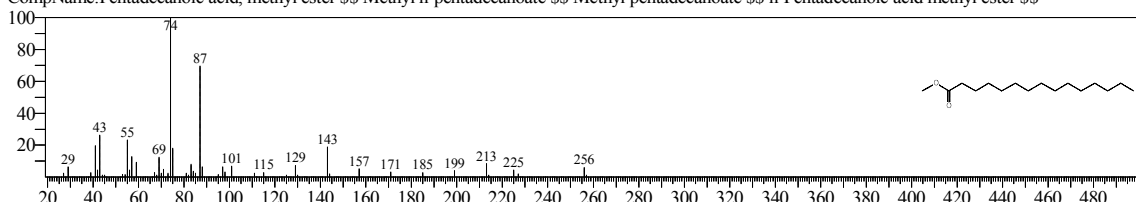

Hit#:5 Entry:70951 Library:NIST08.LIB

SI:84 Formula:C15H30O2 CAS:5129-58-8 MolWeight:242 RetIndex:1615

CompName:Tridecanoic acid, 12-methyl-, methyl ester \$\$ Methyl isomyristate \$\$ Methyl 12-methyltridecanoate \$\$

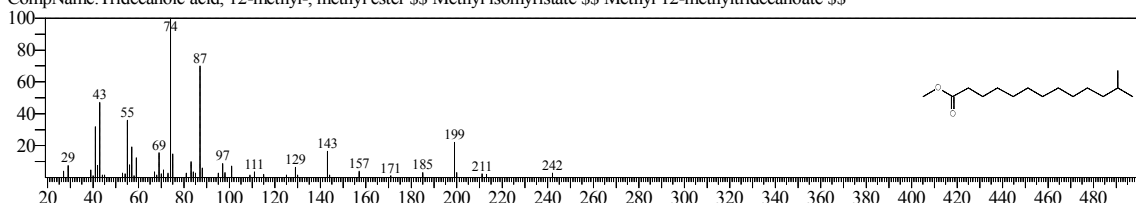

<< Target >>

Line#:15 R.Time:48.870(Scan#:9075) MassPeaks:244  
RawMode:Single 48.870(9075) BasePeak:97.10(1426)  
BG Mode:48.800(9061) Group 1 - Event 1

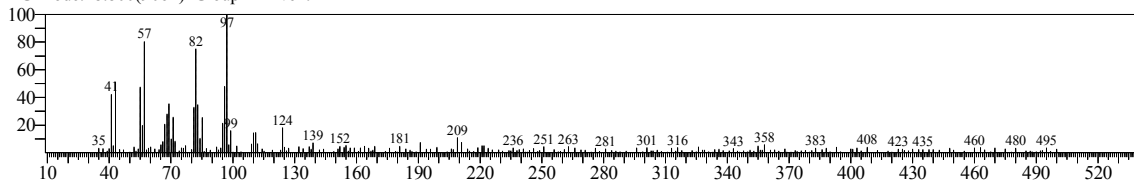

Hit#:1 Entry:179650 Library:NIST08.LIB  
SI:81 Formula:C30H62O2 CAS:36645-68-8 MolWeight:454 RetIndex:3489  
CompName:1,30-Triacontanediol

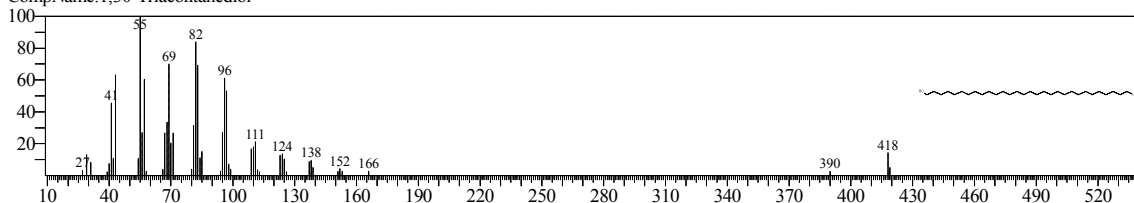

Hit#:2 Entry:186507 Library:NIST08.LIB  
SI:81 Formula:C38H74 CAS:0-00-0 MolWeight:530 RetIndex:3779  
CompName:1,37-Octatriacontadiene

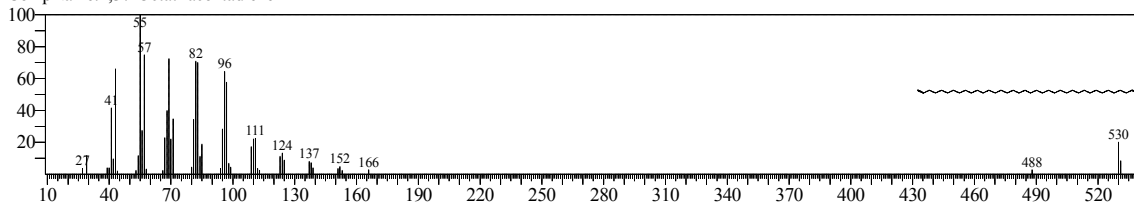

Hit#:3 Entry:60326 Library:NIST08.LIB  
SI:81 Formula:C15H30O CAS:2765-11-9 MolWeight:226 RetIndex:1701  
CompName:1,14-Pentadecanal

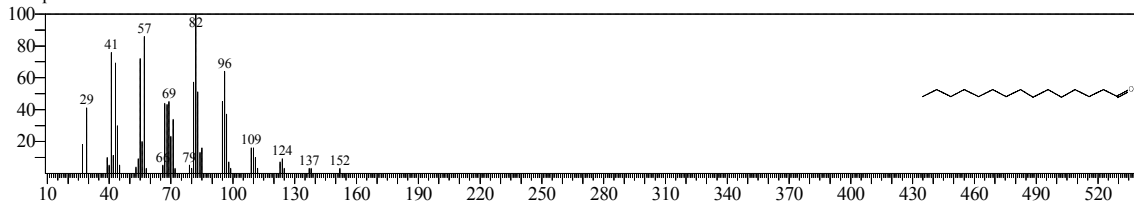

Hit#:4 Entry:89227 Library:NIST08.LIB  
SI:81 Formula:C18H36O CAS:638-66-4 MolWeight:268 RetIndex:1999  
CompName:Octadecanal \$\$\$\$ Stearaldehyde \$\$\$\$ Octadecyl aldehyde \$\$\$\$ Stearyl aldehyde \$\$\$\$ n-Octadecanal \$\$\$\$

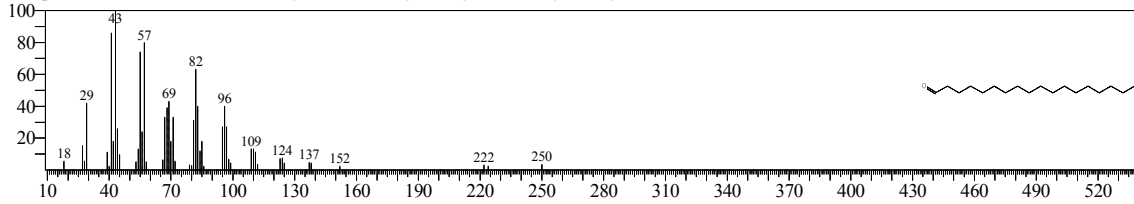

Hit#:5 Entry:16402 Library:NIST08s.LIB  
SI:81 Formula:C13H26O CAS:10486-19-8 MolWeight:198 RetIndex:1502  
CompName:Tridecanal \$\$\$\$ n-Tridecylaldehyde \$\$\$\$ Tridecanaldehyde \$\$\$\$ Tridecyl aldehyde \$\$\$\$ 1-Tridecanal \$\$\$\$ Tridecane aldehyde \$\$\$\$

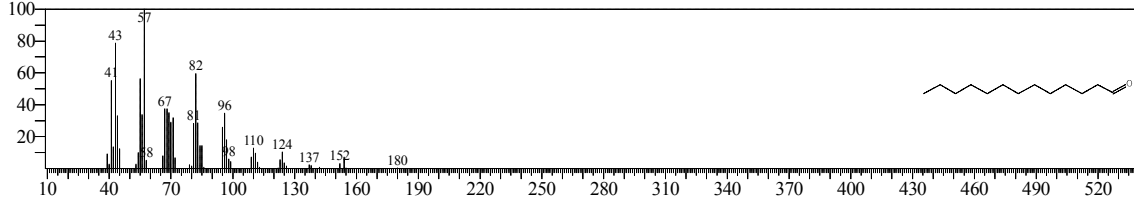

<< Target >>

Line#:16 R.Time:51.490(Scan#:9599) MassPeaks:228

RawMode:Single 51.490(9599) BasePeak:97.10(6275)

BG Mode:51.405(9582) Group 1 - Event 1

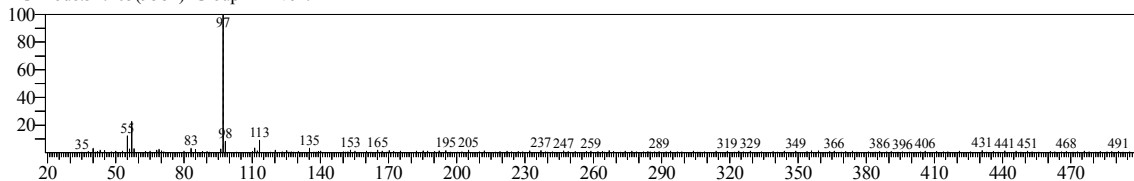

Hit#:1 Entry:58941 Library:NIST08.LIB

SI:73 Formula:C16H32 CAS:39761-73-4 MolWeight:224 RetIndex:1343

CompName:2,4,4,6,6,8,8-Heptamethyl-2-nonene

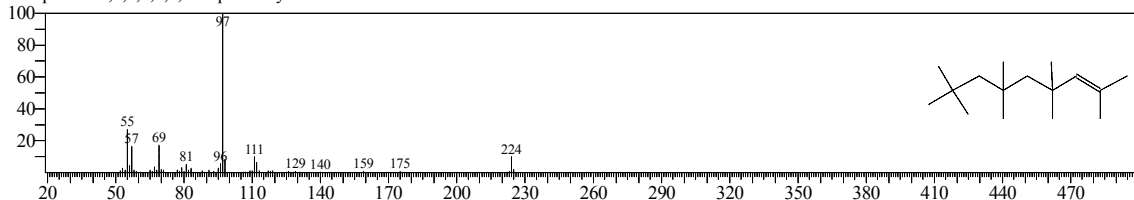

Hit#:2 Entry:2861 Library:NIST08s.LIB

SI:73 Formula:C6H12Si CAS:6224-91-5 MolWeight:112 RetIndex:545

CompName:1-(Trimethylsilyl)-1-propyne \$\$ 1-(Trimethylsilyl)propyne \$\$ Silane, trimethyl-1-propynyl- \$\$ Trimethyl(1-propynyl)silane # \$\$

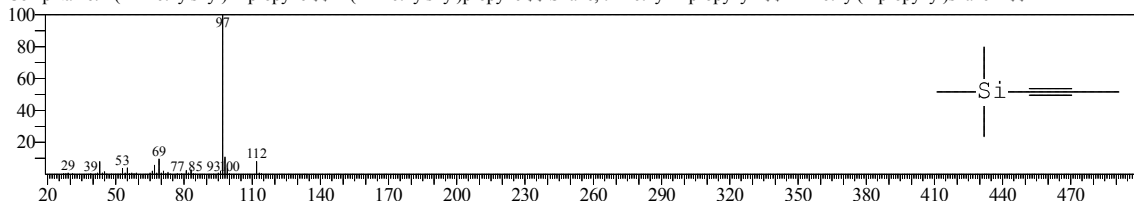

Hit#:3 Entry:158581 Library:NIST08.LIB

SI:73 Formula:C21H45O3P CAS:0-00-0 MolWeight:376 RetIndex:0

CompName:Bis(3,7-dimethyloctyl) methylphosphonate

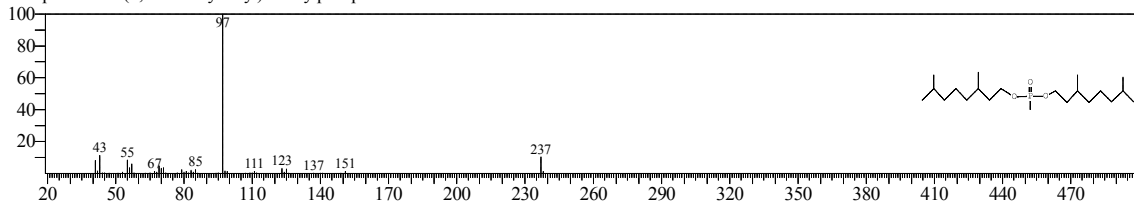

Hit#:4 Entry:125933 Library:NIST08.LIB

SI:73 Formula:C17H37O3P CAS:0-00-0 MolWeight:320 RetIndex:0

CompName:Bis(2-ethylhexyl) methylphosphonate

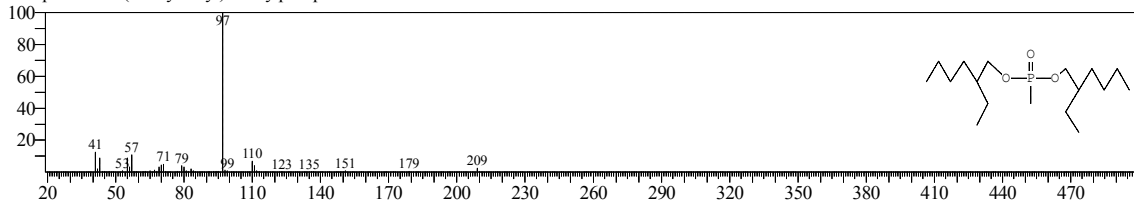

Hit#:5 Entry:163506 Library:NIST08.LIB

SI:73 Formula:C22H44O3S CAS:0-00-0 MolWeight:388 RetIndex:2895

CompName:Sulfurous acid, cyclohexylmethyl pentadecyl ester

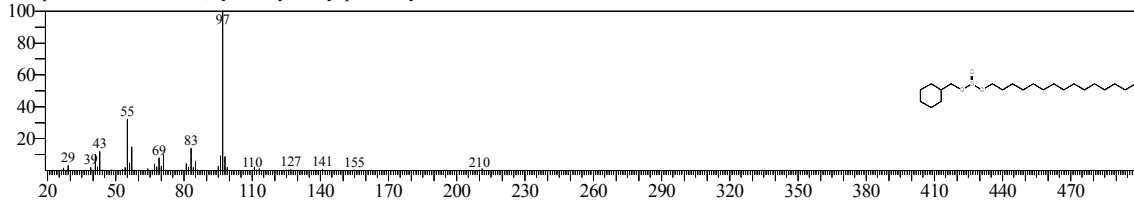



<< Target >>

Line#:17 R.Time:52.710(Scan#:9843) MassPeaks:266

RawMode:Single 52.710(9843) BasePeak:57.05(2988)

BG Mode:52.555(9812) Group 1 - Event 1

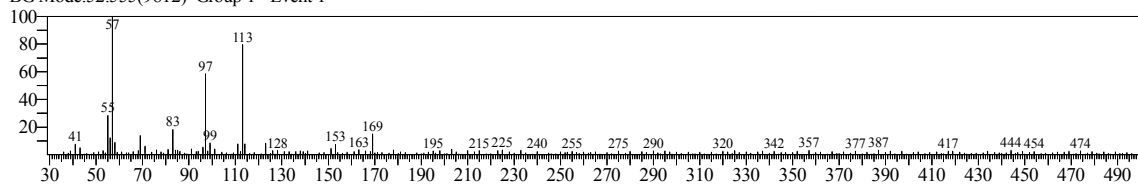

Hit#:1 Entry:58935 Library:NIST08.LIB

SI:71 Formula:C16H32 CAS:15796-04-0 MolWeight:224 RetIndex:1325

CompName:2,4,4,6,6,8,8-Heptamethyl-1-nonene

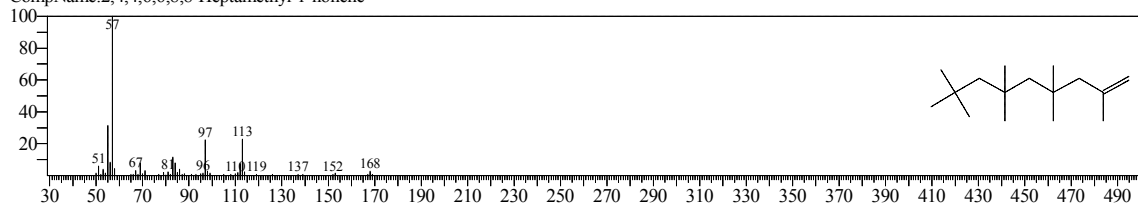

<< Target >>

Line#:18 R.Time:53.140(Scan#:9929) MassPeaks:265

RawMode:Single 53.140(9929) BasePeak:69.00(1405)

BG Mode:53.040(9909) Group 1 - Event 1

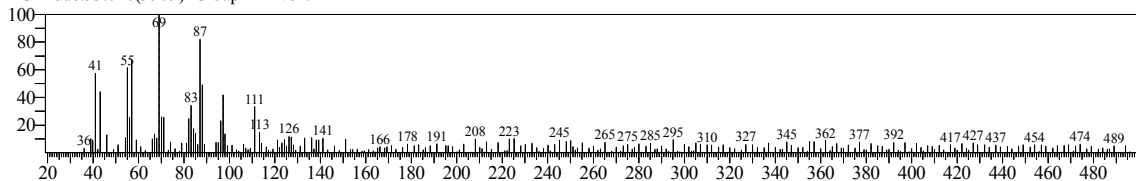

Hit#:1 Entry:128769 Library:NIST08.LIB

SI:81 Formula:C21H40O2 CAS:0-00-0 MolWeight:324 RetIndex:2243

CompName:Methacrylic acid, heptadecyl ester

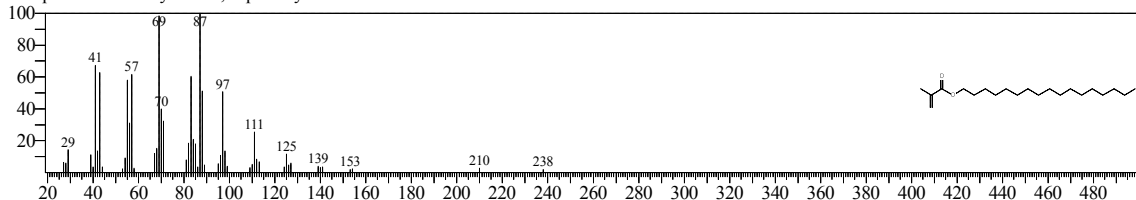

Hit#:2 Entry:137968 Library:NIST08.LIB

SI:81 Formula:C22H42O2 CAS:112-08-3 MolWeight:338 RetIndex:2343

CompName:Octadecyl methacrylate \$\$ Octadecyl 2-methylacrylate # \$\$

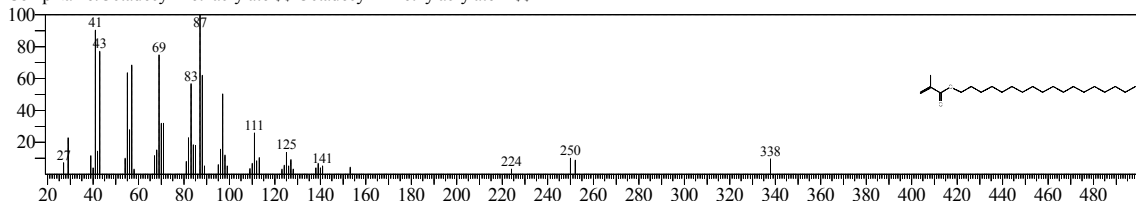

Hit#:3 Entry:119289 Library:NIST08.LIB

SI:81 Formula:C20H38O2 CAS:0-00-0 MolWeight:310 RetIndex:2144

CompName:Methacrylic acid, hexadecyl ester

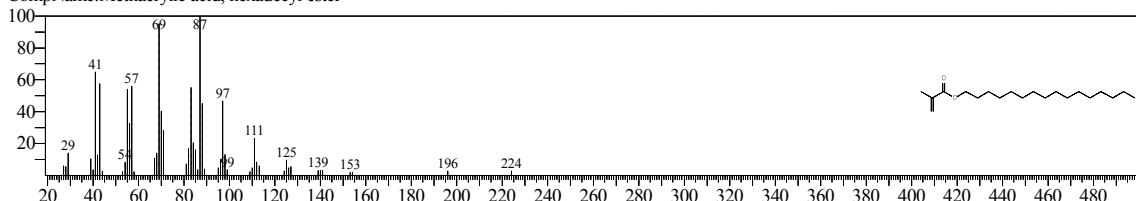

Hit#:4 Entry:99188 Library:NIST08.LIB

SI:80 Formula:C18H34O2 CAS:0-00-0 MolWeight:282 RetIndex:1945

CompName:Methacrylic acid, tetradecyl ester

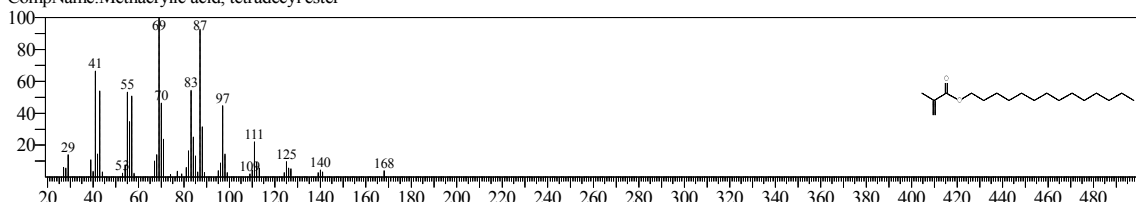

Hit#:5 Entry:109293 Library:NIST08.LIB

SI:80 Formula:C19H36O2 CAS:0-00-0 MolWeight:296 RetIndex:2044

CompName:Methacrylic acid, pentadecyl ester

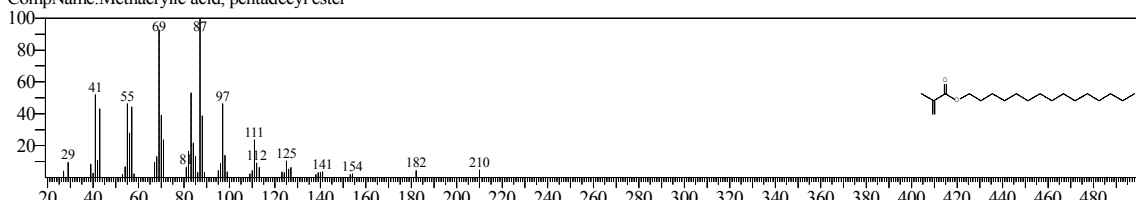

<< Target >>

Line#:19 R.Time:57.470(Scan#:10795) MassPeaks:249

RawMode:Single 57.470(10795) BasePeak:82.05(1341)

BG Mode:57.405(10782) Group 1 - Event 1

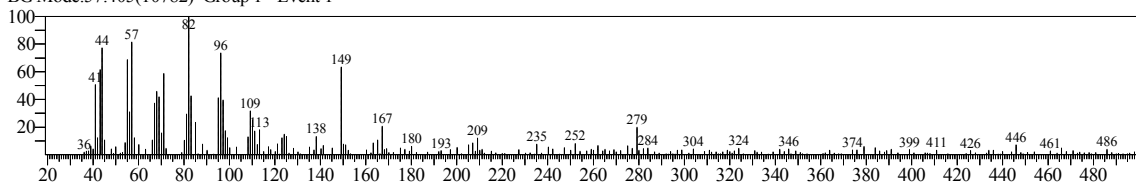

Hit#:1 Entry:87712 Library:NIST08.LIB

SI:83 Formula:C18H34O CAS:56554-87-1 MolWeight:266 RetIndex:2007

CompName:16-Octadecenal \$\$ (16E)-16-Octadecenal # \$\$

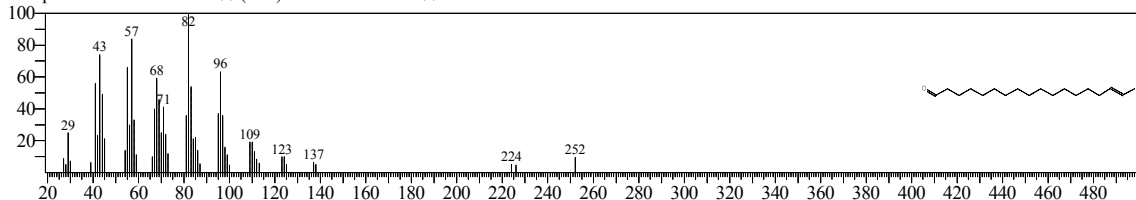

Hit#:2 Entry:20690 Library:NIST08s.LIB

SI:83 Formula:C16H32O CAS:629-80-1 MolWeight:240 RetIndex:1800

CompName:Hexadecanal \$\$ Palmitaldehyde \$\$

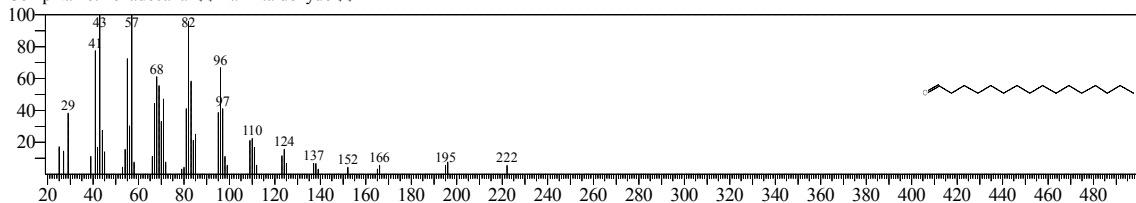

Hit#:3 Entry:99261 Library:NIST08.LIB

SI:83 Formula:C19H38O CAS:67860-04-2 MolWeight:282 RetIndex:2000

CompName:Oxirane, heptadecyl- \$\$ 1,2-Epoxy-nonadecane \$\$ 2-Heptadecyloxirane # \$\$

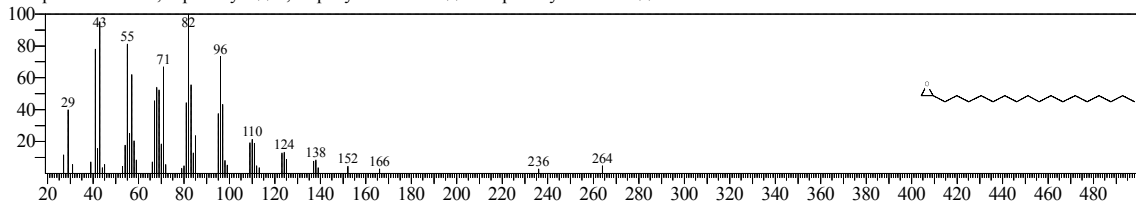

Hit#:4 Entry:87711 Library:NIST08.LIB

SI:83 Formula:C18H34O CAS:56554-86-0 MolWeight:266 RetIndex:1989

CompName:17-Octadecenal

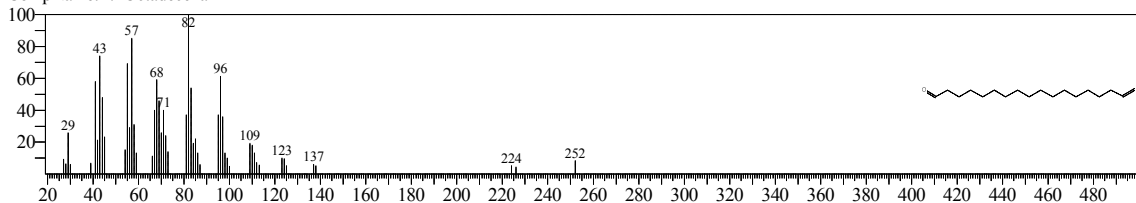

Hit#:5 Entry:22613 Library:NIST08s.LIB

SI:83 Formula:C18H36O CAS:638-66-4 MolWeight:268 RetIndex:1999

CompName:Octadecanal \$\$ Stearaldehyde \$\$ Octadecyl aldehyde \$\$ Stearyl aldehyde \$\$ n-Octadecanal \$\$

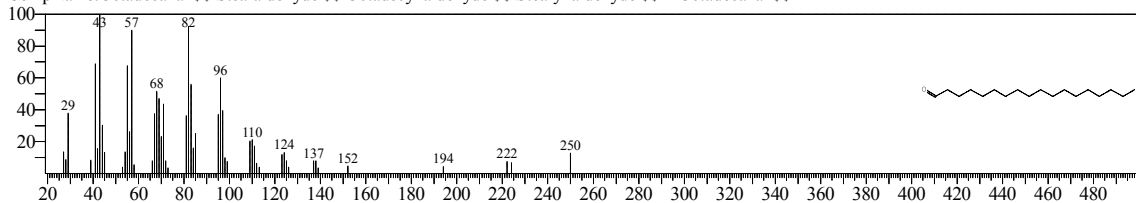

Supplement: pone.0206982.s001.pdf [file pone.0206982.s001.pdf]
